# Supplementary material for: Nickel-catalyzed [4+2] cycloaddition for highly substituted arenes
Source: Royal Society of Chemistry journal article supplement (doi:10.1039/c2cc30801k), 2012-01-01

*Supporting Information for:*

**Nickel-catalyzed [4+2] cycloaddition for highly substituted arenes**

Hiroaki Horie, Takuya Kurahashi,\* and Seiji Matsubara\*

*Department of Material Chemistry, Graduate School of Engineering, Kyoto University  
Kyoto-daigaku Katsura, Nishikyo-ku, Kyoto 615-8510, Japan*

**Contents**

|                                                                      |    |
|----------------------------------------------------------------------|----|
| <b>Instrumentation and Chemicals</b>                                 | S2 |
| <b>Experimental Procedure and Characterization Data for Products</b> | S3 |
| <b><sup>1</sup>H NMR and <sup>13</sup>C NMR Spectra of Products</b>  | S9 |

## Instrumentation and Chemicals

All manipulations of oxygen- and moisture-sensitive materials were conducted in a dry box or with a standard Schlenk technique under a purified argon atmosphere.  $^1\text{H}$  NMR (500 MHz) and  $^{13}\text{C}$  NMR (125.7 MHz) spectra were taken on Varian UNITY INOVA 500 spectrometer and were recorded in  $\text{CDCl}_3$ . Chemical shifts ( $\delta$ ) are in parts per million relative to  $\text{CHCl}_3$  at 7.26 ppm for  $^1\text{H}$  and relative to  $\text{CDCl}_3$  at 77.0 ppm for  $^{13}\text{C}$  unless otherwise noted. Elemental analyses were performed by Elemental Analysis Center of Kyoto University. High-resolution mass spectra were obtained with a JEOL JMS-MS700 (EI) or a Thermo Fisher SCIENTIFIC EXACTIVE (ESI, APCI) spectrometer. Infrared spectra (IR) spectra were determined on a SHIMADZU IR Affinity-1 spectrometer. Melting points were determined using a YANAKO MP-500D. TLC analyses were performed by means of Merck Kieselgel 60  $\text{F}_{254}$  (0.25 mm) Plates. Visualization was accomplished with UV light (254 nm) and/or an aqueous alkaline  $\text{KMnO}_4$  solution followed by heating. Flash column chromatography was carried out using Kanto Chemical silica gel (spherical, 40–50 mm). Unless otherwise noted, commercially available reagents were used without purification. Toluene was purchased from Wako Pure Chemical Co. and stored in a dry box under a purified argon atmosphere. Triphenylphosphine was purchased from Wako Pure Chemical Co. and purified by recrystallization from ethanol. Dienes **1a–h**,<sup>[1]</sup> cyclododecyne (**2d**), and cyclopentadecyne (**2e**)<sup>[2]</sup> were prepared according to the literature. 1-(4-Methoxyphenyl)-1-heptyne (**2i**) and 1-(4-fluorophenyl)-1-heptyne (**2j**) were prepared by Sonogashira cross-coupling reaction of 1-heptyne with corresponding aryl iodides. All reactions were performed in WHEATON 5.0 mL V-vial with 20–400 screw cap.

## Experimental procedure and characterization data for nickel-catalyzed [4+2] cycloaddition of diens with alkynes and sequential aromatization

**General procedure.** The reaction was performed in a 5 mL sealed vessel equipped with a Teflon-coated magnetic stirrer tip. An diene **1** (0.50 mmol) and an alkyne **2** (1.5 mmol) were added to a solution of bis(1,5-cyclooctadiene)nickel (7 mg, 0.025 mmol) and triphenylphosphine (8 mg, 0.030 mmol) in toluene (1 mL) in a dry box. The VIAL was taken outside the dry box and heated at 100 °C for 6 h. After cooled to ambient temperature, DBU (0.15 mL, 1.0 mmol) was added to the mixture, and this was stirred vigorously under air at room temperature for 2 h. The resulting reaction mixture was filtered through a silica gel pad and concentrated *in vacuo*. The residue was purified by flash silica gel column chromatography (hexane/ethyl acetate = 10:1) to give the corresponding arene **3**.

### 2-Ethyl 4-methyl 5,6-dipropyl-[1,1'-biphenyl]-2,4-dicarboxylate (**3aa**).

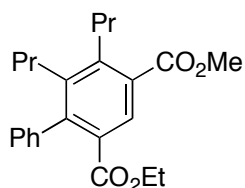

Colorless oil. <sup>1</sup>H NMR (500 MHz, CDCl<sub>3</sub>): δ 8.08 (s, 1H), 7.36 (m, 3H), 7.16 (m, 2H), 3.95 (q, *J* = 7.0 Hz, 2H), 3.92 (s, 3H), 2.95 (t, *J* = 8.0 Hz, 2H), 2.42 (t, *J* = 8.0 Hz, 2H), 1.59 (m, 2H), 1.31 (m, 2H), 1.04 (t, *J* = 7.0 Hz, 3H), 0.92 (t, *J* = 7.5 Hz, 3H), 0.72 (t, *J* = 7.5 Hz, 3H). <sup>13</sup>C NMR (125 MHz, CDCl<sub>3</sub>): δ 168.33, 167.83, 145.50, 144.89, 141.64, 140.18, 130.27, 130.07, 128.80, 128.74, 127.59, 127.02, 60.75, 52.13, 32.18, 32.04, 25.12, 24.38, 14.71, 14.51, 13.64. IR (neat): 2962, 1728, 1232, 703 cm<sup>-1</sup>. HRMS (APCI) calcd for C<sub>23</sub>H<sub>29</sub>O<sub>4</sub> ([M+H]<sup>+</sup>): 369.2060. Found: 360.2053. Anal calcd for C<sub>23</sub>H<sub>28</sub>O<sub>4</sub>: C, 74.97; H, 7.66. Found: C, 74.91; H, 7.67.

### 2-Ethyl 4-methyl 4'-methoxy-5,6-dipropyl-[1,1'-biphenyl]-2,4-dicarboxylate (**3ba**).

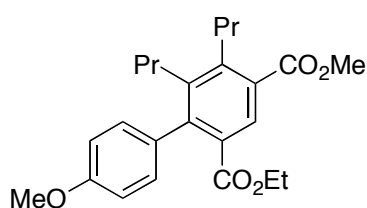

White powder, mp. 66–67 °C (hexane-AcOEt). <sup>1</sup>H NMR (500 MHz, CDCl<sub>3</sub>): δ 8.04 (s, 1H), 7.07 (d, *J* = 9.0 Hz, 2H), 6.91 (d, *J* = 9.0 Hz, 2H), 3.98 (q, *J* = 7.0 Hz, 2H), 3.91 (s, 3H), 3.85 (s, 3H), 2.93 (t, *J* = 8.0 Hz, 2H), 2.43 (t, *J* = 8.0 Hz, 2H), 1.58 (m, 2H), 1.30 (m, 2H), 1.03 (t, *J* = 7.5 Hz, 3H), 0.98 (t, *J* = 7.0 Hz, 3H), 0.74 (t, *J* = 7.0 Hz, 3H). <sup>13</sup>C NMR (125 MHz, CDCl<sub>3</sub>): δ 168.31, 167.99, 158.58, 145.38, 144.56, 142.07, 132.30, 130.43, 129.99, 129.80, 128.53, 113.02, 60.77, 55.19, 52.15, 32.19, 31.97, 25.10, 24.38, 14.75, 14.59, 13.79. IR (KBr): 2961, 1727, 1707, 1516, 1250, 1028, 841 cm<sup>-1</sup>. HRMS (APCI) calcd for C<sub>24</sub>H<sub>31</sub>O<sub>5</sub> ([M+H]<sup>+</sup>): 399.2166. Found: 399.2154. Anal calcd for C<sub>24</sub>H<sub>30</sub>O<sub>5</sub>: C, 72.34; H, 7.59. Found: C, 72.49; H, 7.75.

**2-Ethyl 4-methyl 3'-methoxy-5,6-dipropyl-[1,1'-biphenyl]-2,4-dicarboxylate (3ca).**

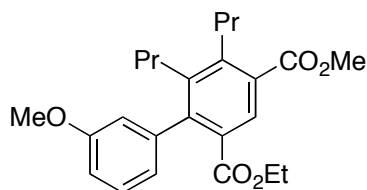

Pale yellow oil.  $^1\text{H}$  NMR (500 MHz,  $\text{CDCl}_3$ ):  $\delta$  8.07 (s, 1H), 7.28 (dd,  $J = 8.0, 7.0$  Hz, 1H), 6.90 (ddd,  $J = 8.0, 2.5, 1.0$  Hz, 1H), 6.76 (ddd,  $J = 7.0, 1.5, 1.0$  Hz, 1H), 6.71 (dd,  $J = 2.5, 1.5$  Hz, 1H), 3.97 (q,  $J = 7.0$  Hz, 2H), 3.92 (s, 3H), 3.80 (s, 3H), 2.94 (t,  $J = 8.5$  Hz, 2H), 2.43 (t,  $J = 8.0$  Hz, 2H), 1.57 (m, 2H), 1.34 (m, 2H), 1.04 (t,  $J = 7.0$  Hz, 3H), 0.96 (t,  $J = 7.0$  Hz, 3H), 0.75 (t,  $J = 7.0$  Hz, 3H).  $^{13}\text{C}$  NMR (125 MHz,  $\text{CDCl}_3$ ):  $\delta$  168.27, 167.78, 158.93, 145.59, 144.58, 141.55, 141.44, 130.17, 129.93, 128.72, 128.62, 121.42, 114.36, 112.67, 60.79, 55.24, 52.20, 32.15, 32.05, 25.12, 24.61, 14.78, 14.63, 13.69. IR (neat): 2960, 1727, 1589, 1465, 1233, 790, 708  $\text{cm}^{-1}$ . HRMS (APCI) calcd for  $\text{C}_{24}\text{H}_{31}\text{O}_5$  ( $[\text{M}+\text{H}]^+$ ): 399.2166. Found: 399.2154.

**2-Ethyl 4-methyl 4'-fluoro-5,6-dipropyl-[1,1'-biphenyl]-2,4-dicarboxylate (3da).**

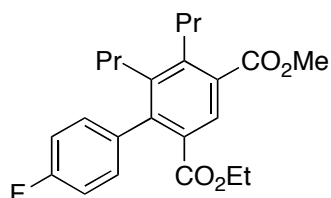

Pale yellow oil.  $^1\text{H}$  NMR (500 MHz,  $\text{CDCl}_3$ ):  $\delta$  8.09 (s, 1H), 7.14–7.06 (m, 4H), 3.99 (q,  $J = 7.0$  Hz, 2H), 3.92 (s, 3H), 2.93 (t,  $J = 8.0$  Hz, 2H), 2.39 (t,  $J = 8.0$  Hz, 2H), 1.58 (m, 2H), 1.29 (m, 2H), 1.04 (t,  $J = 7.0$  Hz, 3H), 0.99 (t,  $J = 7.0$  Hz, 3H), 0.74 (t,  $J = 7.0$  Hz, 3H).  $^{13}\text{C}$  NMR (125 MHz,  $\text{CDCl}_3$ ):  $\delta$  168.23, 167.56, 161.98 (d,  $J_{\text{CF}} = 245$  Hz), 145.66, 143.84, 141.84, 135.99 (d,  $J_{\text{CF}} = 3.3$  Hz), 130.46, 130.33 (d,  $J_{\text{CF}} = 7.6$  Hz), 129.93, 128.87, 114.62 (d,  $J_{\text{CF}} = 21.5$  Hz), 60.87, 52.23, 32.18, 32.02, 25.11, 24.34, 14.75, 14.57, 13.76. IR (neat): 2963, 1727, 1513, 838  $\text{cm}^{-1}$ . HRMS (APCI) calcd for  $\text{C}_{27}\text{H}_{28}\text{FO}_4$  ( $[\text{M}+\text{H}]^+$ ): 387.1966. Found: 387.1951.

**2-Ethyl 4-methyl 5,6-dipropyl-4'-(trifluoromethyl)-[1,1'-biphenyl]-2,4-dicarboxylate (3ea).**

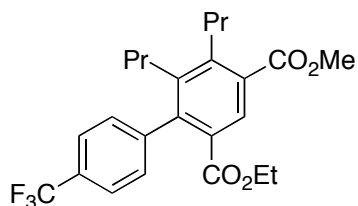

White powder, mp. 55–56  $^{\circ}\text{C}$  (hexane-AcOEt).  $^1\text{H}$  NMR (500 MHz,  $\text{CDCl}_3$ ):  $\delta$  8.16 (s, 1H), 7.66 (d,  $J = 8.5$  Hz, 2H), 7.30 (d,  $J = 8.5$  Hz, 2H), 3.97 (q,  $J = 7.0$  Hz, 2H), 3.93 (s, 3H), 2.94 (t,  $J = 8.0$  Hz, 2H), 2.36 (t,  $J = 8.5$  Hz, 2H), 1.59 (m, 2H), 1.29 (m, 2H), 1.04 (t,  $J = 7.0$  Hz, 3H), 0.93 (t,  $J = 7.5$  Hz, 3H), 0.72 (t,  $J = 7.5$  Hz, 3H).  $^{13}\text{C}$  NMR (125 MHz,  $\text{CDCl}_3$ ):  $\delta$  168.14, 167.10, 146.02, 144.24, 143.50, 141.35, 130.86, 129.31 (q,  $J_{\text{CF}} = 32.4$  Hz), 129.30, 129.21, 129.16, 124.58 (q,  $J_{\text{CF}} = 3.9$  Hz), 124.22 (q,  $J_{\text{CF}} = 271$  Hz), 60.94, 52.30, 32.14, 32.03, 25.11, 24.38, 14.75, 14.53, 13.54. IR (KBr): 2969, 1730, 1701, 1324, 1237, 1163, 1126, 842  $\text{cm}^{-1}$ . HRMS (APCI) calcd for  $\text{C}_{24}\text{H}_{28}\text{F}_3\text{O}_4$  ( $[\text{M}+\text{H}]^+$ ): 437.1934. Found: 437.1926. Anal calcd for  $\text{C}_{24}\text{H}_{27}\text{F}_3\text{O}_4$ : C, 66.04; H, 6.24. Found: C, 66.32; H, 6.26.

**2-Ethyl 4-methyl 2'-methyl-5,6-dipropyl-[1,1'-biphenyl]-2,4-dicarboxylate (3fa).**

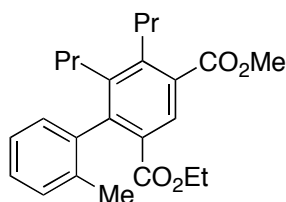

Colorless oil.  $^1\text{H}$  NMR (500 MHz,  $\text{CDCl}_3$ ):  $\delta$  8.14 (s, 1H), 7.26–7.15 (m, 3H), 6.99 (dd,  $J = 7.5, 1.0$  Hz, 1H), 3.96 (q,  $J = 7.0$  Hz, 2H), 3.92 (s, 3H), 3.07 (m, 1H), 2.84 (m, 1H), 2.47 (m, 1H), 2.16 (m, 1H), 1.97 (s, 3H), 1.63 (m, 1H), 1.56 (m, 1H), 1.34–1.18 (m, 2H), 1.03 (t,  $J = 7.5$  Hz, 3H), 0.93 (t,  $J = 7.0$  Hz, 3H), 0.69 (t,  $J = 7.0$  Hz, 3H).  $^{13}\text{C}$  NMR (125 MHz,  $\text{CDCl}_3$ ):  $\delta$  168.38, 167.48, 145.84, 144.41, 141.54, 139.52, 135.66, 130.08, 129.41, 129.32, 129.19, 128.63, 127.35, 125.04, 60.71, 52.19, 32.09, 32.02, 25.17, 23.83, 19.97, 14.69, 14.67, 13.61. IR (neat): 2961, 1728, 1233, 730  $\text{cm}^{-1}$ . HRMS (APCI) calcd for  $\text{C}_{24}\text{H}_{31}\text{O}_4$  ( $[\text{M}+\text{H}]^+$ ): 383.2217. Found: 383.2204.

**1-tert-Butyl 3-ethyl 4-(naphthalen-1-yl)-5,6-dipropylisophthalate (3ga)**

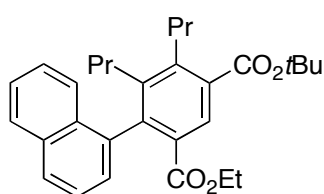

Pale yellow viscous oil.  $^1\text{H}$  NMR (500 MHz,  $\text{CDCl}_3$ ):  $\delta$  8.04 (s, 1H), 7.86 (m, 2H), 7.46 (m, 2H), 7.31 (m, 2H), 7.21 (dd,  $J = 7.0, 1.0$  Hz, 1H), 3.68 (q,  $J = 7.5$  Hz, 2H), 3.03 (m, 1H), 2.85 (m, 1H), 2.39 (m, 1H), 2.07 (m, 1H), 1.65 (m, 2H), 1.65 (s, 9H), 1.23 (m, 2H), 1.04 (t,  $J = 7.5$  Hz, 3H), 0.56 (t,  $J = 7.5$  Hz, 3H), 0.47 (t,  $J = 7.0$  Hz, 3H).  $^{13}\text{C}$  NMR (125 MHz,  $\text{CDCl}_3$ ):  $\delta$  167.98, 167.60, 144.38, 142.25, 142.08, 138.00, 133.43, 133.13, 132.60, 130.47, 128.50, 128.03, 127.47, 126.34, 125.90, 125.84, 125.59, 124.83, 81.78, 60.39, 32.57, 32.07, 28.18, 25.24, 24.60, 14.71, 14.52, 13.04. IR (neat): 2964, 1722, 1251, 1153, 1028, 851, 802, 781  $\text{cm}^{-1}$ . HRMS (EI) calcd for  $\text{C}_{30}\text{H}_{36}\text{O}_4$  ( $[\text{M}]^+$ ): 460.2614. Found: 460.2607.

**2-Ethyl 4-methyl 5,6-diethyl-[1,1'-biphenyl]-2,4-dicarboxylate (3ab).**

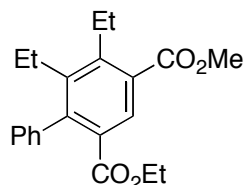

White powder, mp. 41–42 °C (hexane-AcOEt).  $^1\text{H}$  NMR (500 MHz,  $\text{CDCl}_3$ ):  $\delta$  8.09 (s, 1H), 7.37 (m, 3H), 7.18 (m, 2H), 3.95 (q,  $J = 7.5$  Hz, 2H), 3.93 (s, 3H), 3.03 (q,  $J = 7.5$  Hz, 2H), 2.52 (q,  $J = 7.5$  Hz, 2H), 1.24 (t,  $J = 7.5$  Hz, 3H), 0.93 (t,  $J = 7.5$  Hz, 3H), 0.92 (t,  $J = 7.5$  Hz, 3H).  $^{13}\text{C}$  NMR (125 MHz,  $\text{CDCl}_3$ ):  $\delta$  168.25, 167.75, 146.76, 144.90, 142.62, 140.07, 130.17, 130.01, 128.80, 128.75, 127.62, 127.03, 60.78, 52.20, 23.17, 22.64, 15.87, 15.32, 13.65. IR (KBr): 2984, 1725, 1711, 1244, 707  $\text{cm}^{-1}$ . HRMS (APCI) calcd for  $\text{C}_{21}\text{H}_{25}\text{O}_4$  ( $[\text{M}+\text{H}]^+$ ): 341.1747. Found: 341.1733. Anal calcd for  $\text{C}_{21}\text{H}_{24}\text{O}_4$ : C, 74.09; H, 7.11. Found: 74.17; H, 7.27.

### 2-ethyl 4-methyl 5,6-dipentyl-[1,1'-biphenyl]-2,4-dicarboxylate (**3ac**).

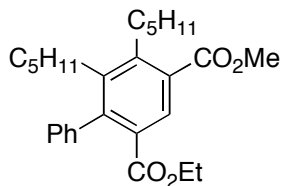

Colorless oil.  $^1\text{H}$  NMR (500 MHz,  $\text{CDCl}_3$ ):  $\delta$  8.07 (s, 1H), 7.35 (m, 3H), 7.16 (d,  $J = 8.0$  Hz, 2H), 3.95 (q,  $J = 7.0$  Hz, 2H), 3.92 (s, 3H), 2.95 (t,  $J = 8.0$  Hz, 2H), 2.43 (t,  $J = 8.0$  Hz, 2H), 1.56 (m, 2H), 1.45–1.34 (m, 4H), 1.27 (m, 2H), 1.08 (m, 4H), 0.92 (t,  $J = 7.0$  Hz, 6H), 0.75 (t,  $J = 7.0$  Hz, 3H).  $^{13}\text{C}$  NMR (125 MHz,  $\text{CDCl}_3$ ):  $\delta$  168.34, 167.81, 145.68, 144.89, 141.72, 140.11, 130.19, 129.87, 128.77, 128.70, 127.57, 127.00, 60.76, 52.18, 32.49, 32.07, 31.52, 30.49, 30.11, 29.71, 22.41, 21.87, 14.05, 13.82, 13.64. IR (neat): 2956, 1727, 1234, 1031, 703  $\text{cm}^{-1}$ . HRMS (APCI) calcd for  $\text{C}_{27}\text{H}_{37}\text{O}_4$  ( $[\text{M}+\text{H}]^+$ ): 425.2686. Found: 425.2675.

### 3-Ethyl 1-methyl 4-phenyl-5,6,7,8,9,10,11,12,13,14-decahydrobenzo[12]annulene-1,3-dicarboxylate (**3ad**).

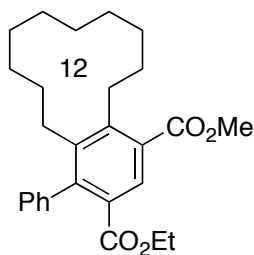

White powder, mp. 83–85 °C (hexane-AcOEt).  $^1\text{H}$  NMR (500 MHz,  $\text{CDCl}_3$ ):  $\delta$  8.06 (s, 1H), 7.35 (m, 3H), 7.16 (d,  $J = 8.0$  Hz, 2H), 3.94 (q,  $J = 7.0$  Hz, 2H), 3.92 (s, 3H), 3.09 (t,  $J = 8.5$  Hz, 2H), 2.55 (t,  $J = 8.5$  Hz, 2H), 1.72 (m, 2H), 1.56 (m, 4H), 1.44 (m, 6H), 1.38 (m, 2H), 1.23 (m, 2H), 0.92 (t,  $J = 7.0$  Hz, 3H).  $^{13}\text{C}$  NMR (125 MHz,  $\text{CDCl}_3$ ):  $\delta$  168.53, 167.81, 145.50, 145.18, 141.75, 140.17, 130.72, 129.93, 128.76, 128.55, 127.53, 127.02, 60.77, 52.22, 29.16, 28.79, 28.58, 28.44, 28.29, 27.88, 27.39, 22.86, 22.65, 13.66. IR (KBr): 2934, 1723, 1705, 1296, 1154, 1028, 702  $\text{cm}^{-1}$ . HRMS (ESI) calcd for  $\text{C}_{27}\text{H}_{35}\text{O}_4$  ( $[\text{M}+\text{H}]^+$ ): 423.2530. Found: 423.2525. Anal calcd for  $\text{C}_{27}\text{H}_{34}\text{O}_4$ : C, 76.74; H, 8.11. Found: C, 76.72; H, 7.99.

### 3-Ethyl 1-methyl 4-phenyl-6,7,8,9,10,11,12,13,14,15,16,17-dodecahydro-5H-benzo[15]annulene-1,3-dicarboxylate (**3ae**).

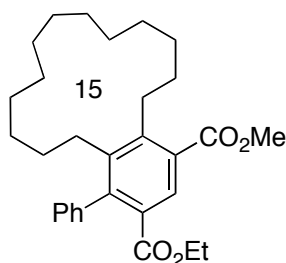

White powder, mp. 104–105 °C (hexane-AcOEt).  $^1\text{H}$  NMR (500 MHz,  $\text{CDCl}_3$ ):  $\delta$  8.10 (s, 1H), 7.36 (m, 3H), 7.15 (d,  $J = 8.0$  Hz, 2H), 3.95 (q,  $J = 7.5$  Hz, 2H), 3.92 (s, 3H), 2.93 (t,  $J = 8.0$  Hz, 2H), 2.42 (t,  $J = 8.5$  Hz, 2H), 1.67–1.55 (m, 4H), 1.45–1.23 (m, 16H), 1.10 (m, 2H), 0.92 (t,  $J = 7.5$  Hz, 3H).  $^{13}\text{C}$  NMR (125 MHz,  $\text{CDCl}_3$ ):  $\delta$  168.28, 167.76, 145.84, 145.13, 141.83, 140.17, 130.26, 129.90, 128.85, 128.61, 127.60, 126.98, 60.76, 52.20, 30.08, 29.66, 29.30, 28.45, 27.92, 27.56, 26.56, 26.30, 26.27, 26.03, 24.94, 24.92, 13.64. IR (KBr): 2925, 1730, 1705, 1239, 1029, 709  $\text{cm}^{-1}$ . HRMS (ESI) calcd for  $\text{C}_{30}\text{H}_{41}\text{O}_4$  ( $[\text{M}+\text{H}]^+$ ): 465.2999. Found: 465.2996. Anal calcd for  $\text{C}_{30}\text{H}_{40}\text{O}_4$ : C, 77.55; H, 8.68. Found: C,

77.29; H, 8.88.

**2-Ethyl 4-methyl 6-isopropyl-5-methyl-[1,1'-biphenyl]-2,4-dicarboxylate and**

**2-ethyl 4-methyl 5-isopropyl-6-methyl-[1,1'-biphenyl]-2,4-dicarboxylate (1:1 mixture) (3af).**

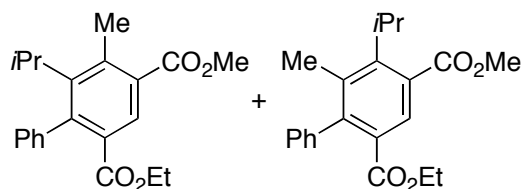

Colorless oil.  $^1\text{H}$  NMR (500 MHz,  $\text{CDCl}_3$ ):  $\delta$  7.98 (s, 0.5H), 7.78 (s, 0.5H), 7.36 (m, 3H), 7.13 (m, 2H), 3.95 (q,  $J = 7.0$  Hz, 2H), 3.92 (s, 3H), 3.46 (sept,  $J = 7.0$  Hz, 0.5H), 3.20 (sept,  $J = 7.0$  Hz, 0.5H), 2.65 (s, 1.5H),

2.11 (s, 1.5H), 1.37 (d,  $J = 7.0$  Hz, 3H), 1.19 (d,  $J = 7.0$  Hz, 3H), 0.92 (t,  $J = 7.0$  Hz, 3H).  $^{13}\text{C}$  NMR (125 MHz,  $\text{CDCl}_3$ ):  $\delta$  170.49, 168.58, 168.04, 167.61, 148.06, 146.20, 144.54, 140.70, 136.57, 132.14, 132.03, 129.51, 128.64, 128.58, 127.92, 127.75, 127.69, 127.46, 127.04, 126.96, 60.81, 60.75, 52.39, 52.19, 31.11, 30.57, 21.10, 20.93, 18.65, 17.92, 13.65, 13.64. IR (neat): 2959, 1728, 1257, 1235, 1030, 703  $\text{cm}^{-1}$ . HRMS (APCI) calcd for  $\text{C}_{21}\text{H}_{25}\text{O}_4$  ( $[\text{M}+\text{H}]^+$ ): 341.1747. Found: 341.1735.

**Diethyl 6'-phenyl-[1,1':2',1''-terphenyl]-3',5'-dicarboxylate (3hg).**

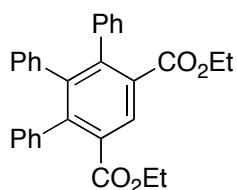

Pale red powder, mp. 128–130 °C (hexane-AcOEt).  $^1\text{H}$  NMR (500 MHz,  $\text{CDCl}_3$ ):  $\delta$  8.25 (s, 1H), 7.10 (m, 6H), 6.97 (m, 4H), 6.87 (m, 3H), 6.68 (m, 2H), 4.02 (q,  $J = 7.0$  Hz, 4H), 0.93 (t,  $J = 7.0$  Hz, 6H).  $^{13}\text{C}$  NMR (125 MHz,  $\text{CDCl}_3$ ):  $\delta$  167.94, 143.77, 142.76, 139.29, 138.01, 131.95, 131.03, 129.43,

129.06, 127.17, 126.78, 126.62, 125.93, 61.15, 13.61. IR (KBr): 1730, 1318, 1200, 1085, 761, 699  $\text{cm}^{-1}$ . HRMS (APCI) calcd for  $\text{C}_{30}\text{H}_{27}\text{O}_4$  ( $[\text{M}+\text{H}]^+$ ): 451.1904. Found: 451.1893. Anal calcd for  $\text{C}_{30}\text{H}_{26}\text{O}_4$ : C, 79.98; H, 5.82. Found: C, 79.98; H, 5.96.

**Diethyl 2'-methyl-[1,1':3',1''-terphenyl]-4',6'-dicarboxylate (3hh).**

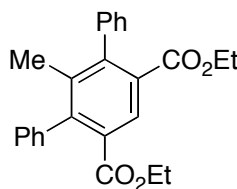

Pale red powder, mp. 68–72 °C (hexane-AcOEt).  $^1\text{H}$  NMR (500 MHz,  $\text{CDCl}_3$ ):  $\delta$  8.15 (s, 1H), 7.39 (m, 6H), 7.19 (d,  $J = 8.0$  Hz, 4H), 4.01 (q,  $J = 7.0$  Hz, 4H), 1.81 (s, 3H), 0.96 (t,  $J = 7.0$  Hz, 6H).  $^{13}\text{C}$  NMR (125 MHz,  $\text{CDCl}_3$ ):  $\delta$  167.73, 144.68, 140.11, 136.71, 131.32, 128.54, 128.03, 127.60,

127.19, 60.96, 18.83, 13.66. IR (KBr): 1719, 1251, 1026, 765, 707  $\text{cm}^{-1}$ . HRMS (APCI) calcd for  $\text{C}_{25}\text{H}_{25}\text{O}_4$  ( $[\text{M}+\text{H}]^+$ ): 389.1747. Found: 389.1736.

**4'-Ethyl 6'-methyl 4-methoxy-2'-pentyl-[1,1':3',1''-terphenyl]-4',6'-dicarboxylate (3ai).**

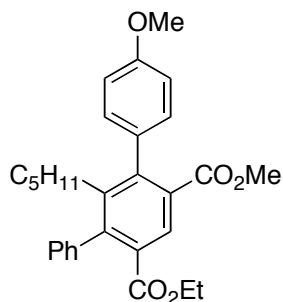

Pale yellow viscous oil.  $^1\text{H}$  NMR (500 MHz,  $\text{CDCl}_3$ ):  $\delta$  8.08 (s, 1H), 7.36 (m, 3H), 7.22 (d,  $J = 8.0$  Hz, 2H), 7.13 (d,  $J = 8.5$  Hz, 2H), 6.93 (d,  $J = 8.5$  Hz, 2H), 3.99 (q,  $J = 7.0$  Hz, 2H), 3.85 (s, 3H), 3.60 (s, 3H), 2.25 (t,  $J = 8.0$  Hz, 2H), 1.03 (m, 2H), 0.95 (t,  $J = 7.0$  Hz, 3H), 0.82 (m, 2H), 0.70 (m, 2H), 0.57 (t,  $J = 7.0$  Hz, 3H).  $^{13}\text{C}$  NMR (125 MHz,  $\text{CDCl}_3$ ):  $\delta$  168.04, 167.75, 158.64, 144.47, 144.42, 142.41, 139.55, 131.59, 131.53, 129.88, 128.89, 127.65, 127.30, 127.14, 113.14, 60.93, 55.18, 52.05, 31.62, 30.31, 29.80, 21.49, 13.67, 13.61. IR (neat): 2956, 1728, 1515, 1247, 1032, 833, 704  $\text{cm}^{-1}$ . HRMS (APCI) calcd for  $\text{C}_{29}\text{H}_{33}\text{O}_5$  ( $[\text{M}+\text{H}]^+$ ): 461.2323. Found: 461.2310. Anal calcd for  $\text{C}_{29}\text{H}_{32}\text{O}_5$ : C, 75.63; H, 7.00. Found: C, 75.72; H, 7.02.

**4'-Ethyl 6'-methyl 4-fluoro-2'-pentyl-[1,1':3',1''-terphenyl]-4',6'-dicarboxylate (3ah).**

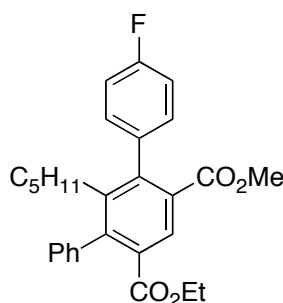

Pale yellow viscous oil.  $^1\text{H}$  NMR (500 MHz,  $\text{CDCl}_3$ ):  $\delta$  8.13 (s, 1H), 7.37 (m, 3H), 7.23–7.17 (m, 4H), 7.10 (m, 2H), 3.99 (q,  $J = 7.0$  Hz, 2H), 3.61 (s, 3H), 2.22 (t,  $J = 8.0$  Hz, 2H), 1.02 (m, 2H), 0.95 (t,  $J = 7.0$  Hz, 3H), 0.81 (m, 2H), 0.70 (m, 2H), 0.57 (t,  $J = 7.0$  Hz, 3H).  $^{13}\text{C}$  NMR (125 MHz,  $\text{CDCl}_3$ ):  $\delta$  167.66, 167.60, 162.01 (d,  $J_{\text{CF}} = 245$  Hz), 144.71, 143.71, 142.19, 139.29, 135.24 (d,  $J_{\text{CF}} = 3.3$  Hz), 132.06, 131.09, 130.42 (d,  $J_{\text{CF}} = 7.6$  Hz), 128.84, 127.70, 127.61, 127.27, 114.75 (d,  $J_{\text{CF}} = 21.0$  Hz), 61.02, 52.07, 31.60, 30.33, 29.78, 21.44, 13.66, 13.59. IR (neat): 2956, 1733, 1512, 838, 703  $\text{cm}^{-1}$ . HRMS (APCI) calcd for  $\text{C}_{28}\text{H}_{30}\text{FO}_4$  ( $[\text{M}+\text{H}]^+$ ): 449.2123. Found: 449.2110. Anal calcd for  $\text{C}_{28}\text{H}_{29}\text{FO}_4$ : C, 74.98; H, 6.52. Found: C, 75.07; H, 6.38.

**References**

- [1] C. Dockendorff, S. Sahli, M. Olsen, L. Milhau, M. Lautens, *J. Am. Chem. Soc.* **2005**, *127*, 15028.
- [2] K. M. Brummond, K. D. Gesenberg, J. L. Kent, A. D. Kerekes, *Tetrahedron Lett.* **1998**, *39*, 8613.



### 3aa

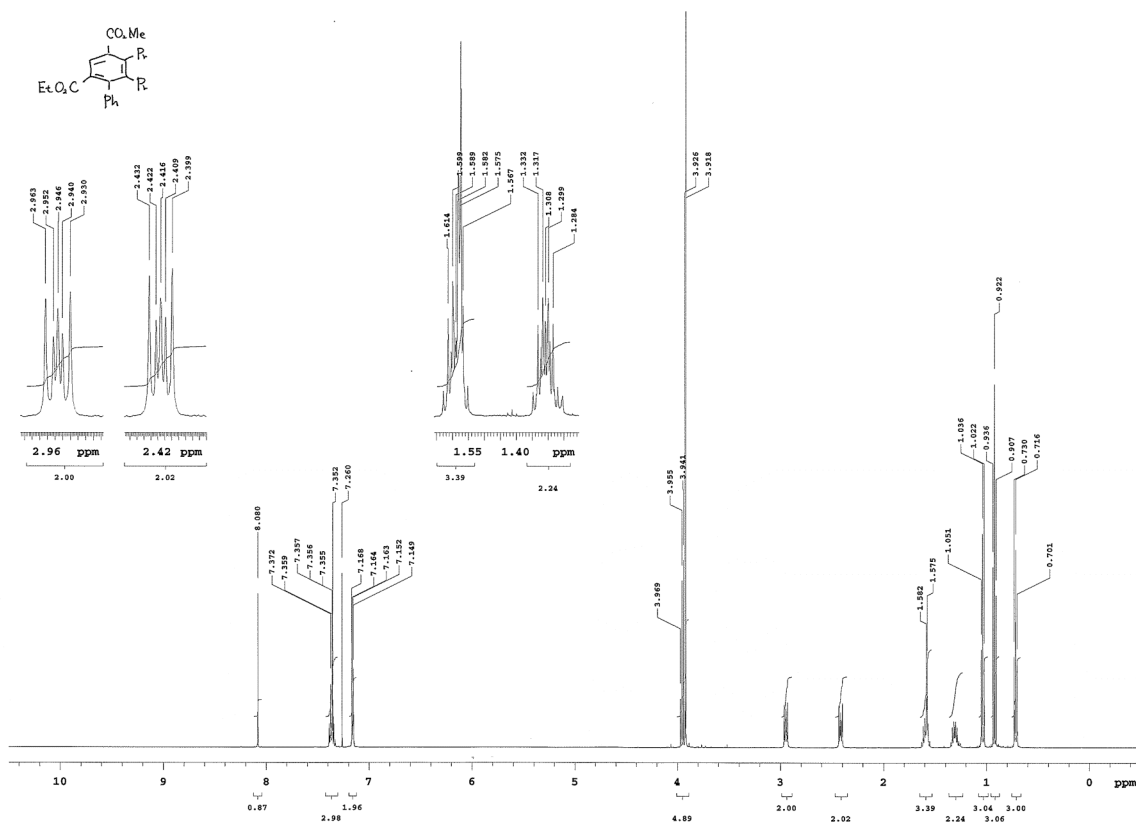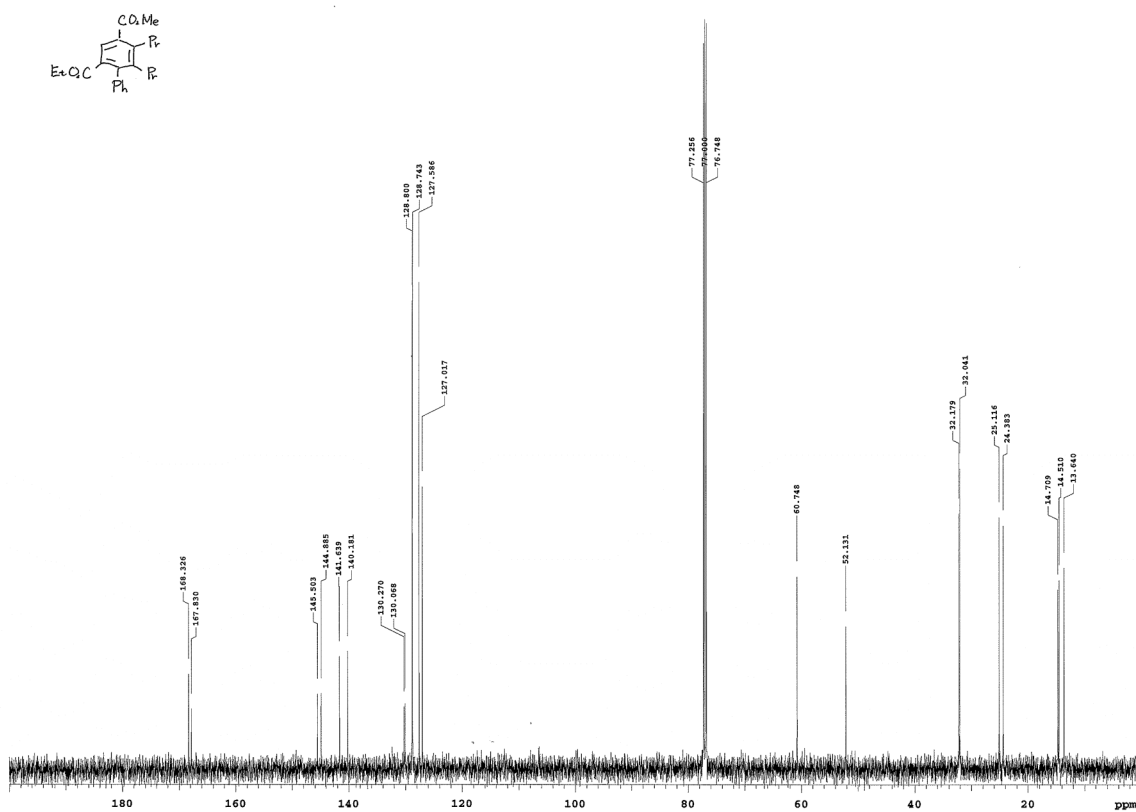

### 3ba

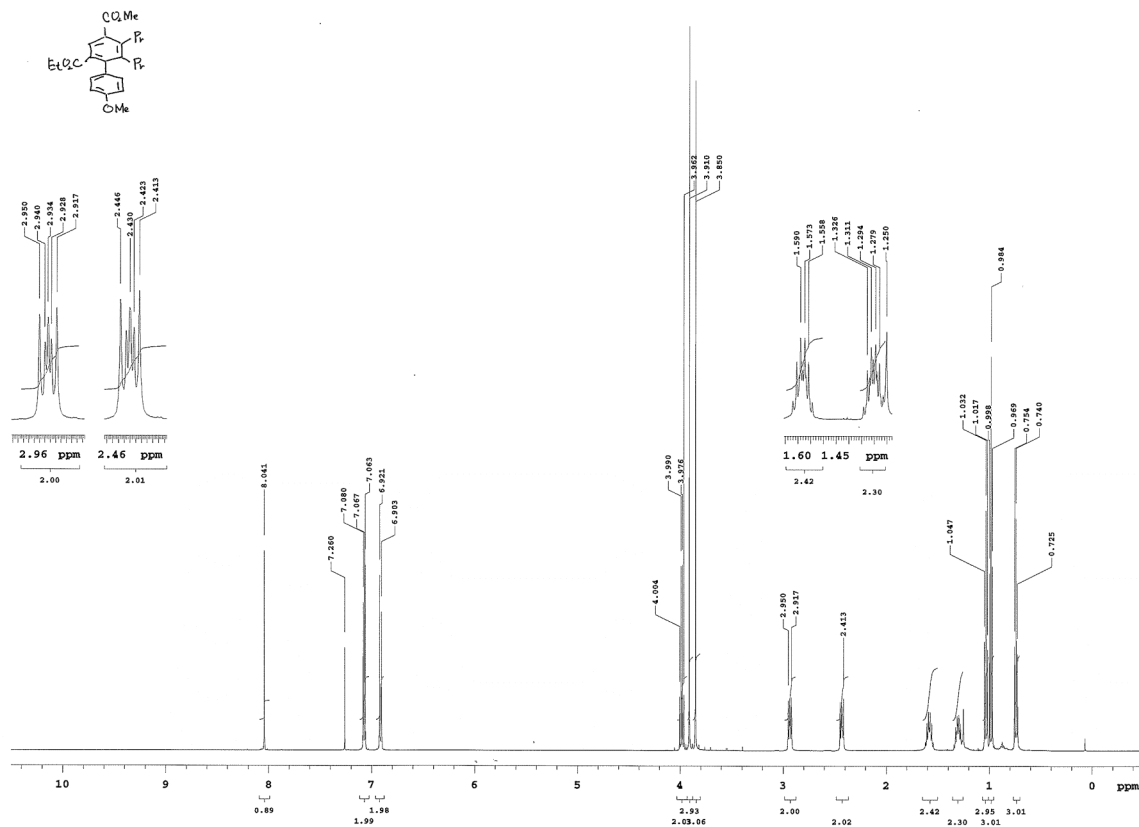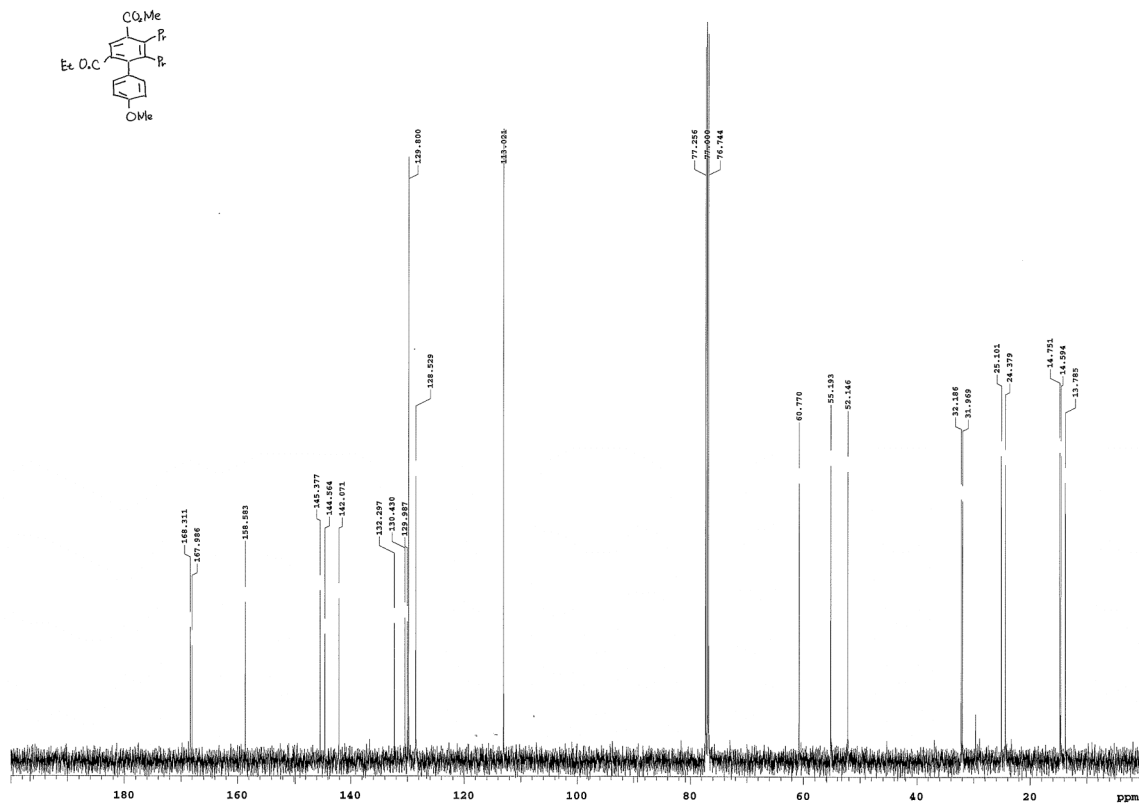

3ca

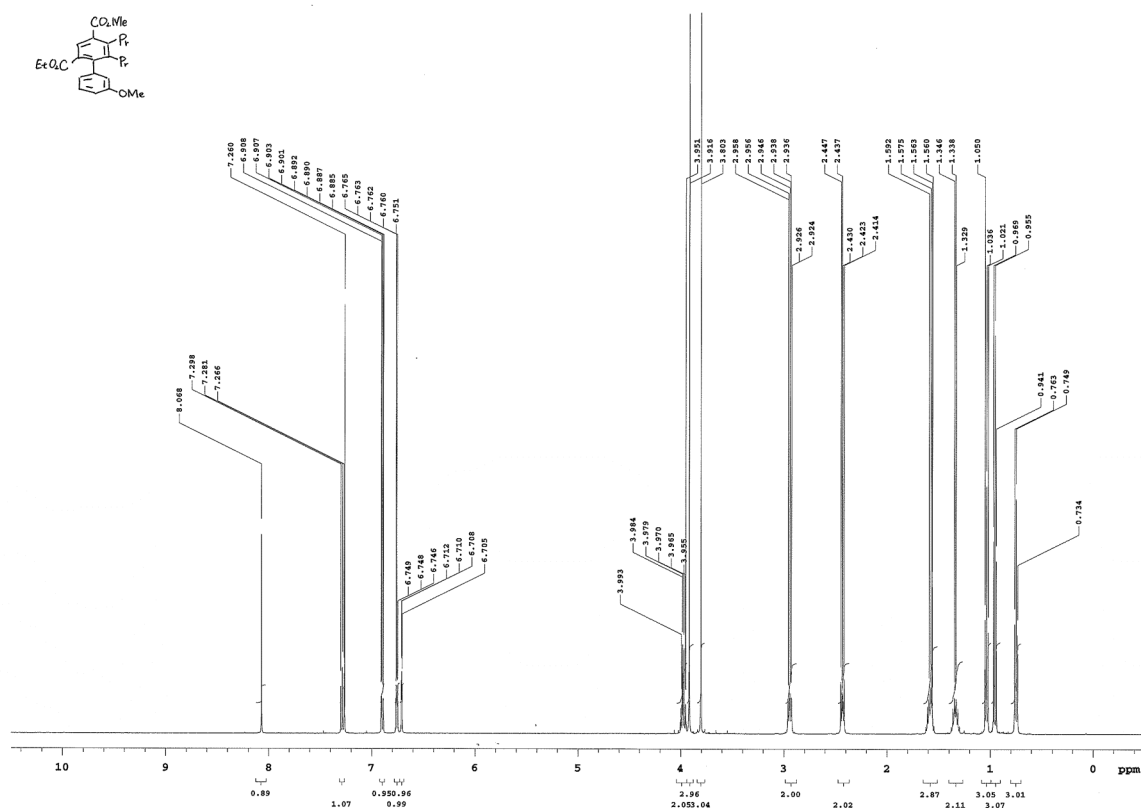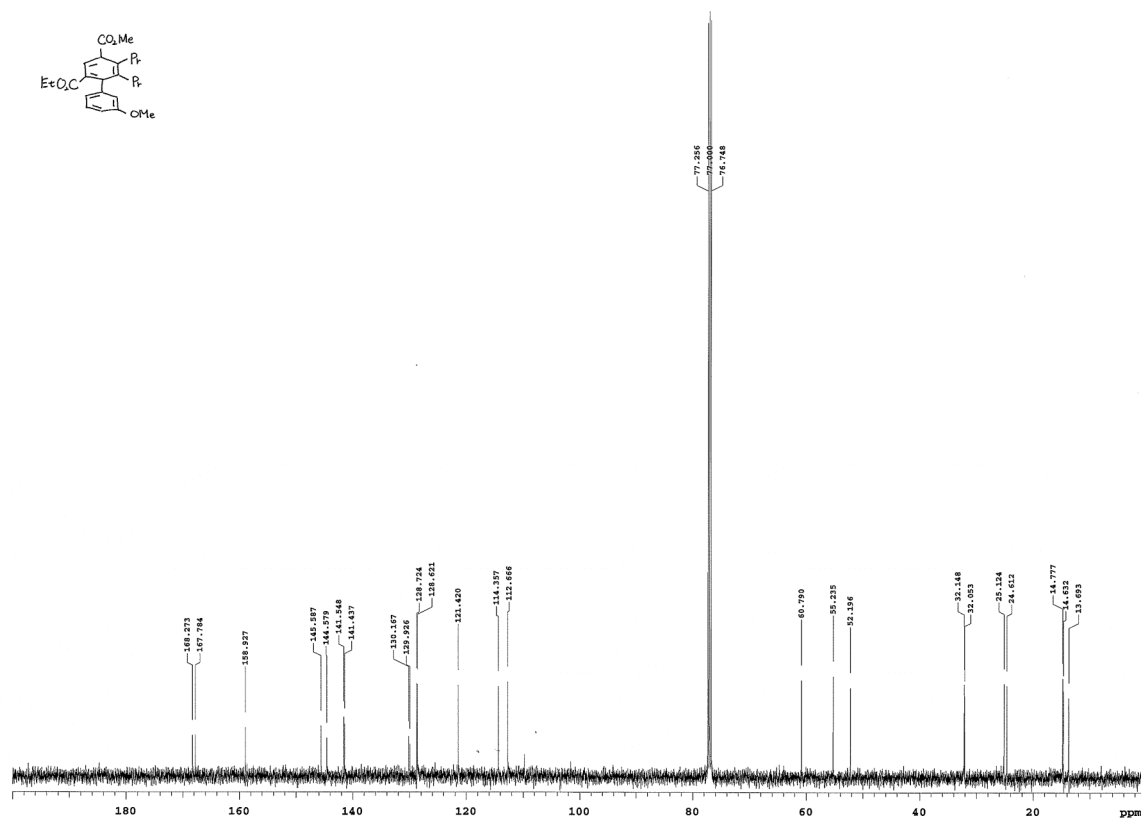

### 3da

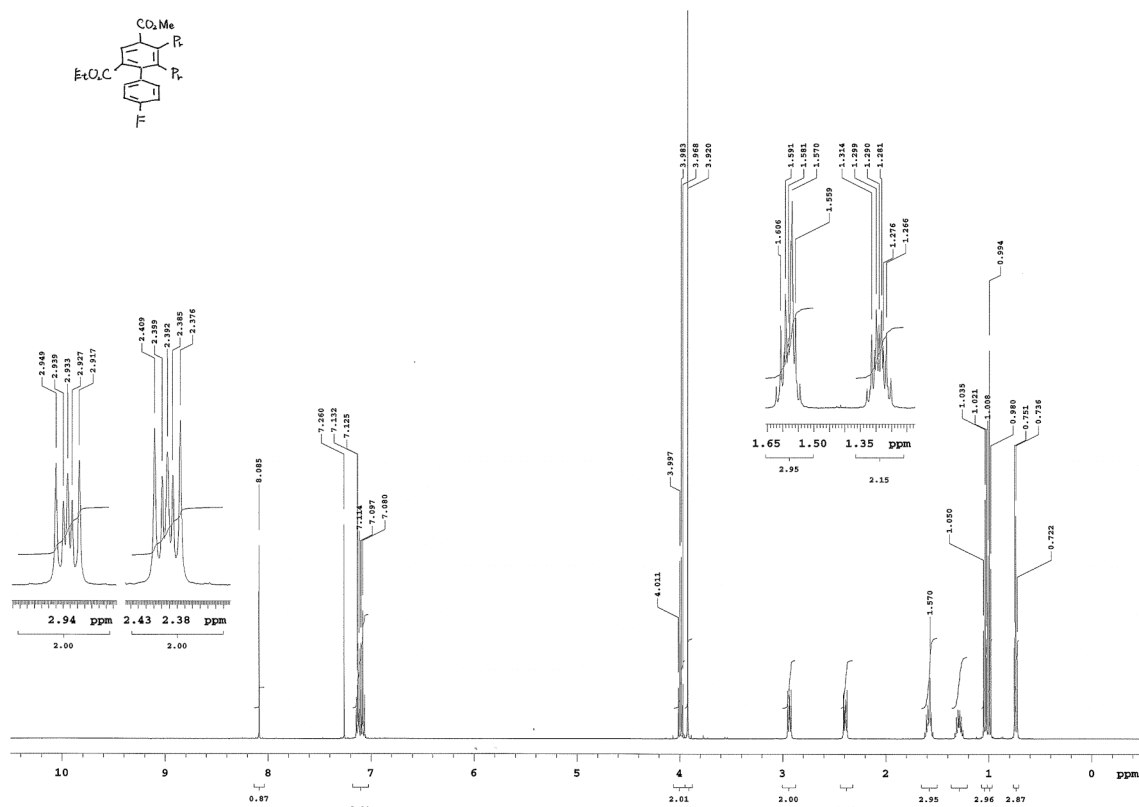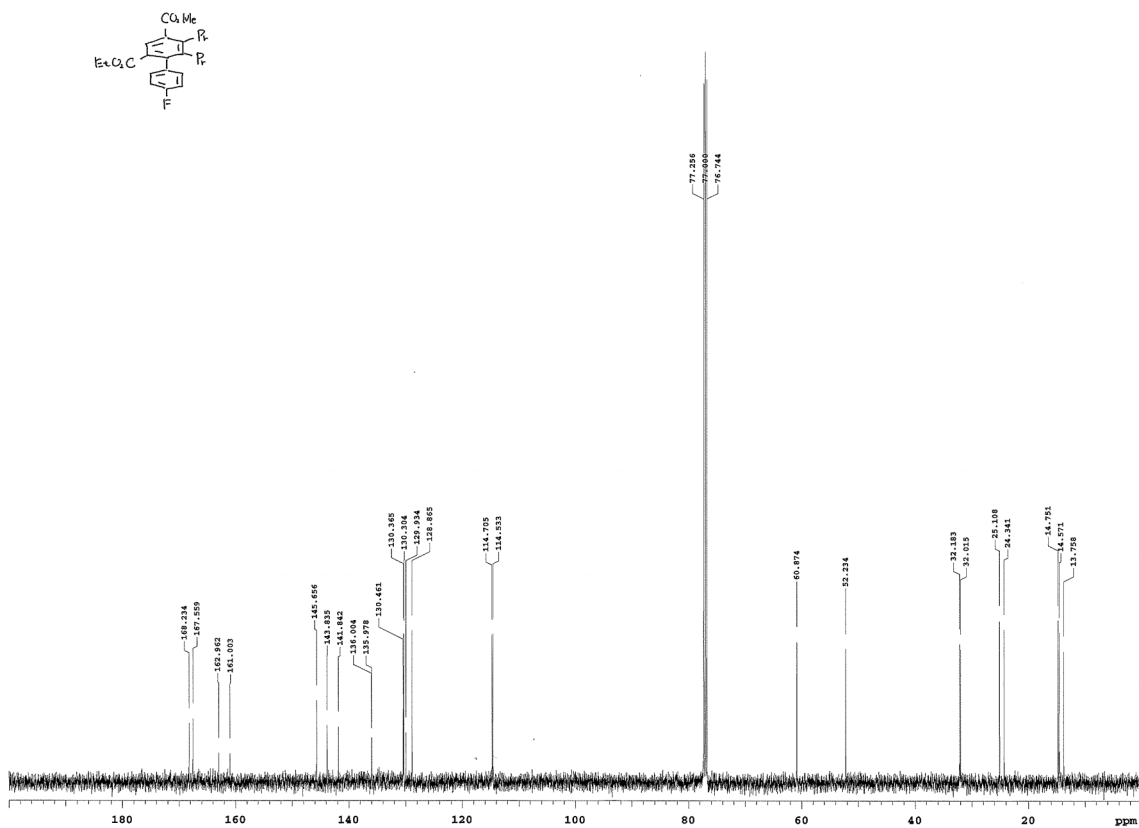

3ea

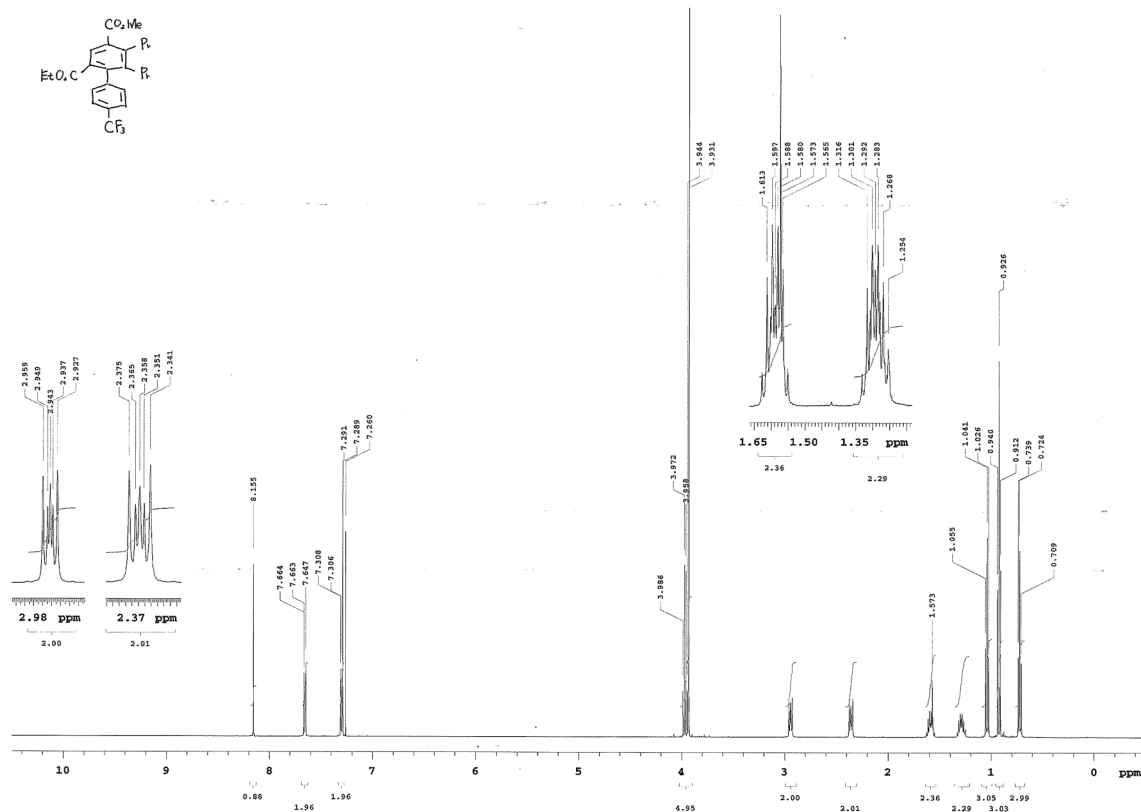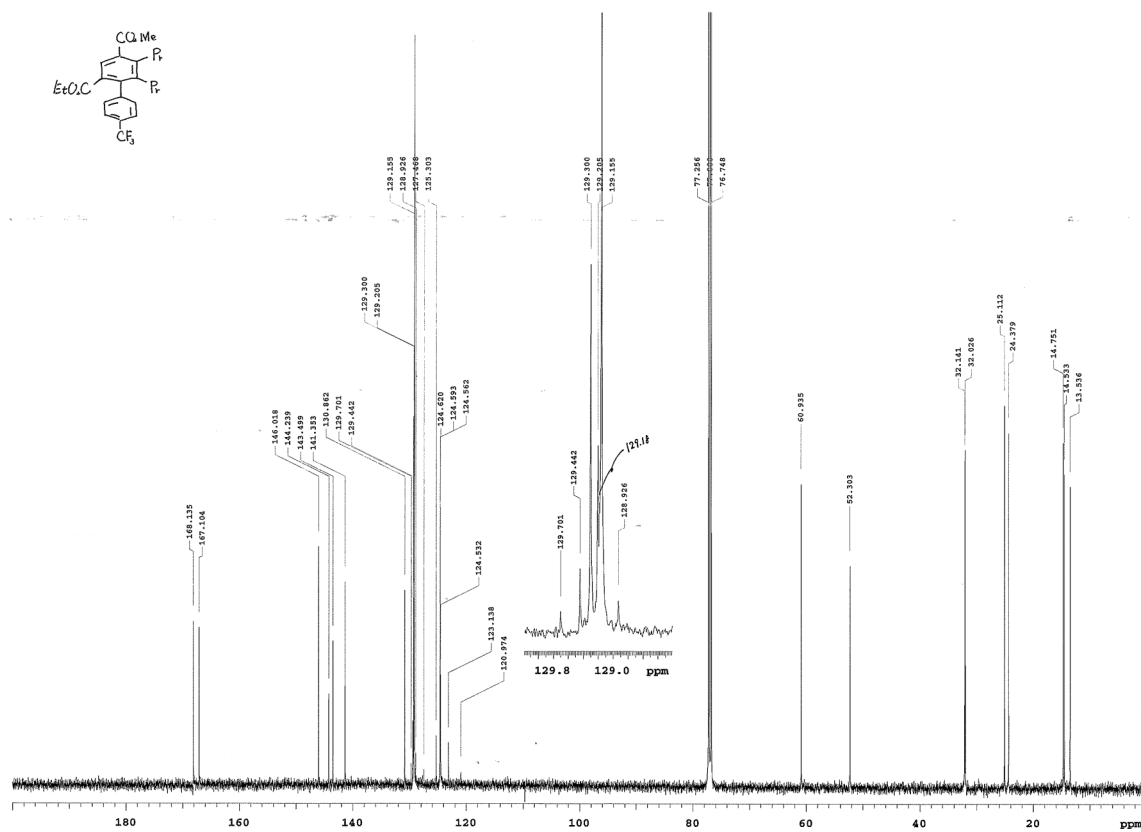

3fa

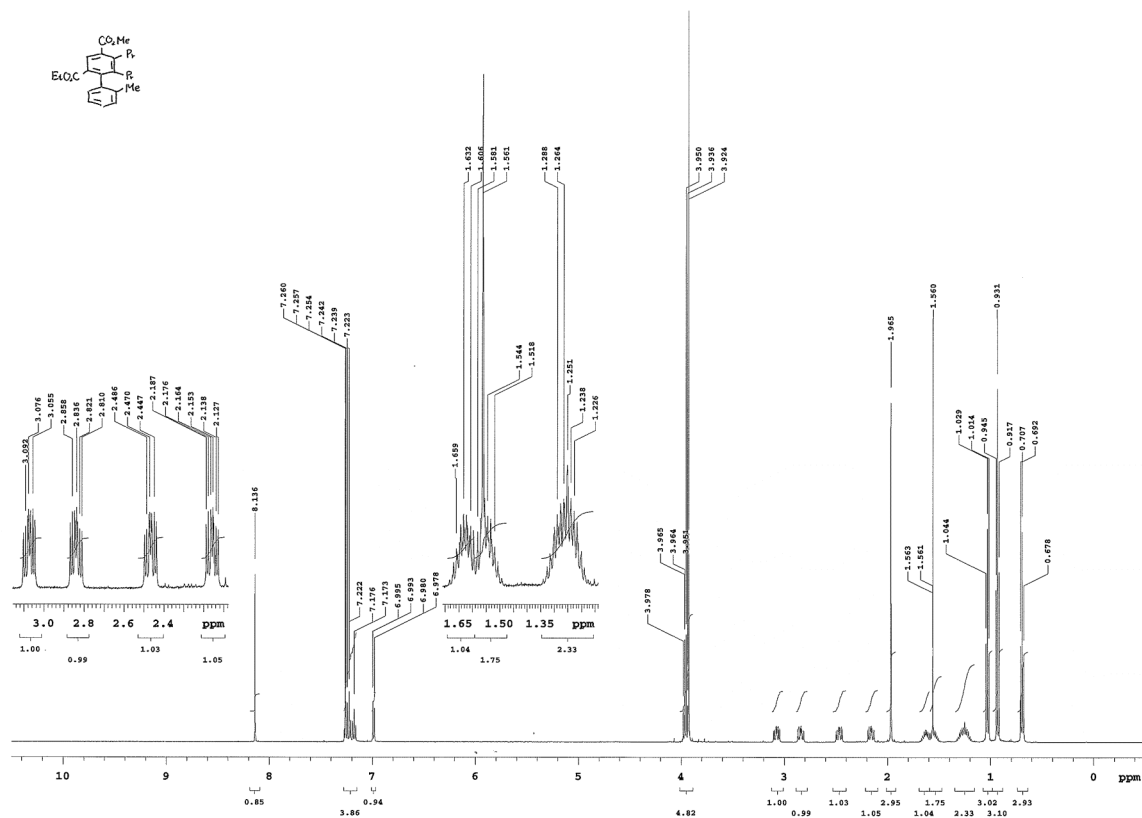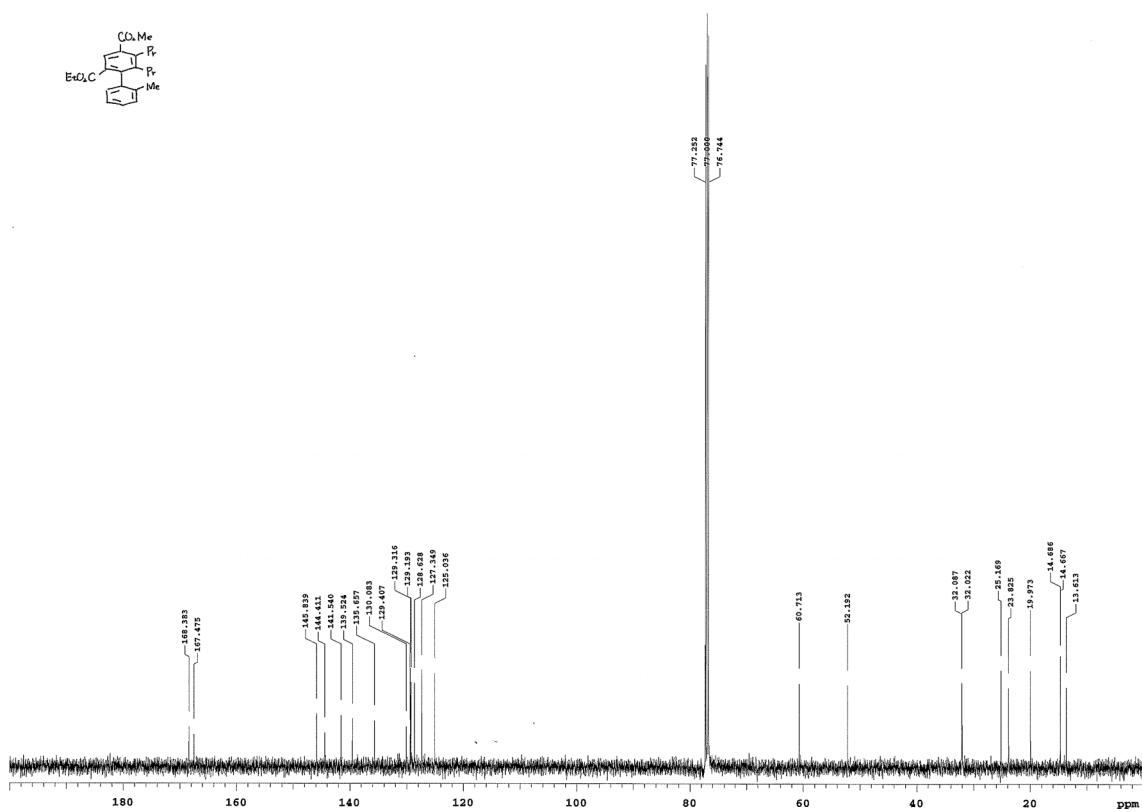

### 3ga

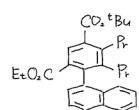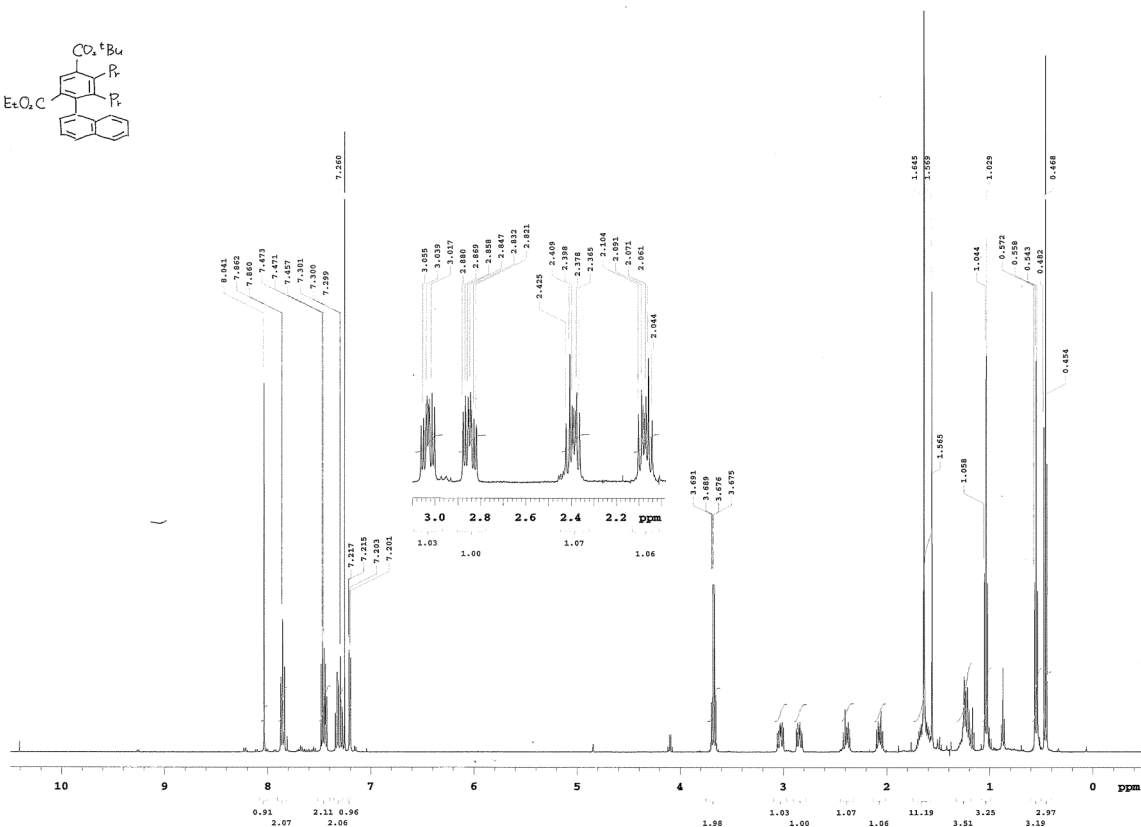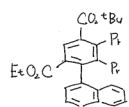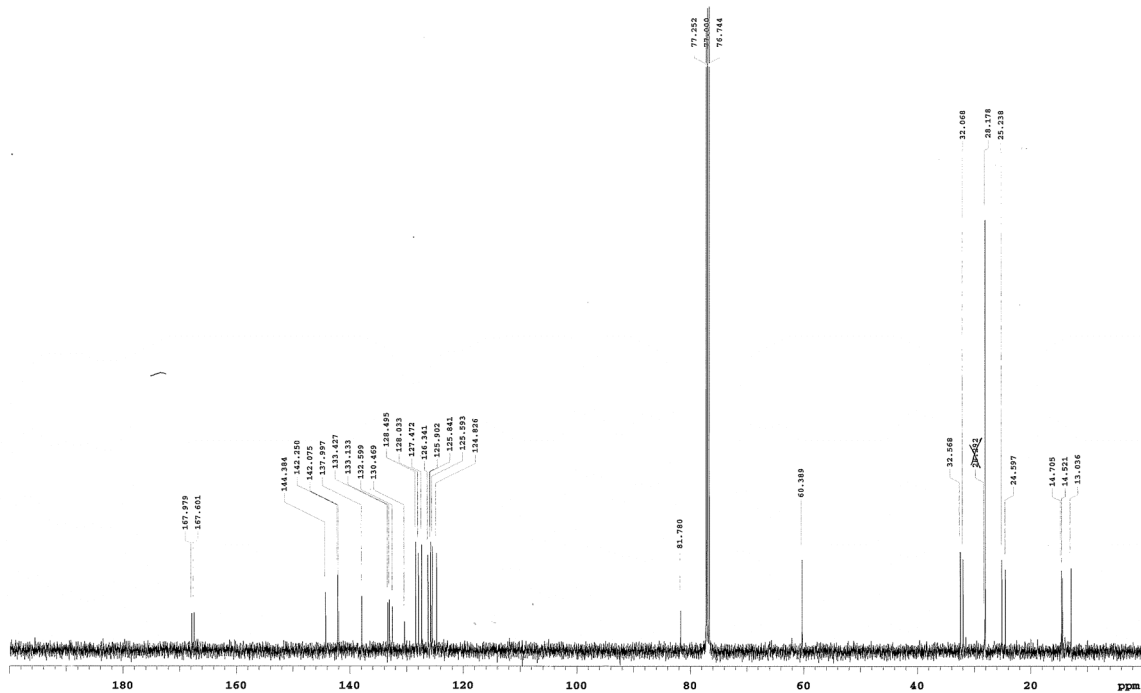

### 3ab

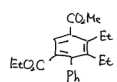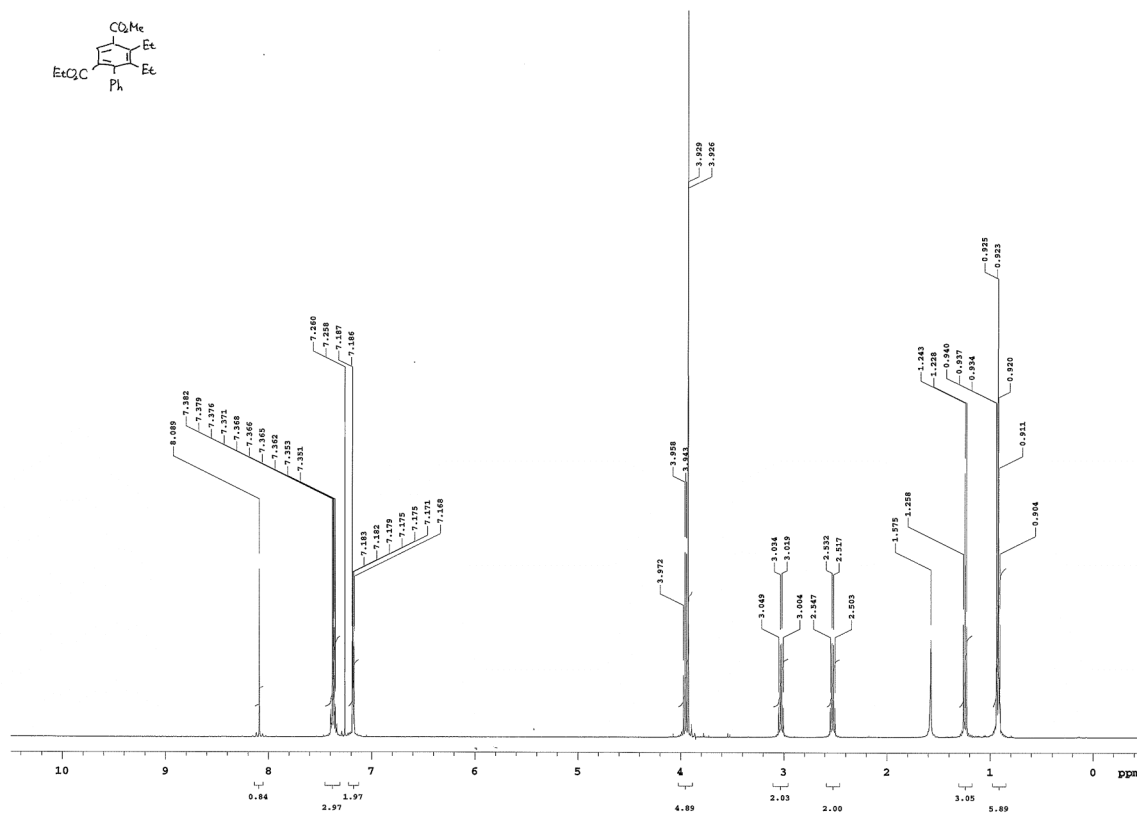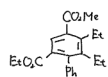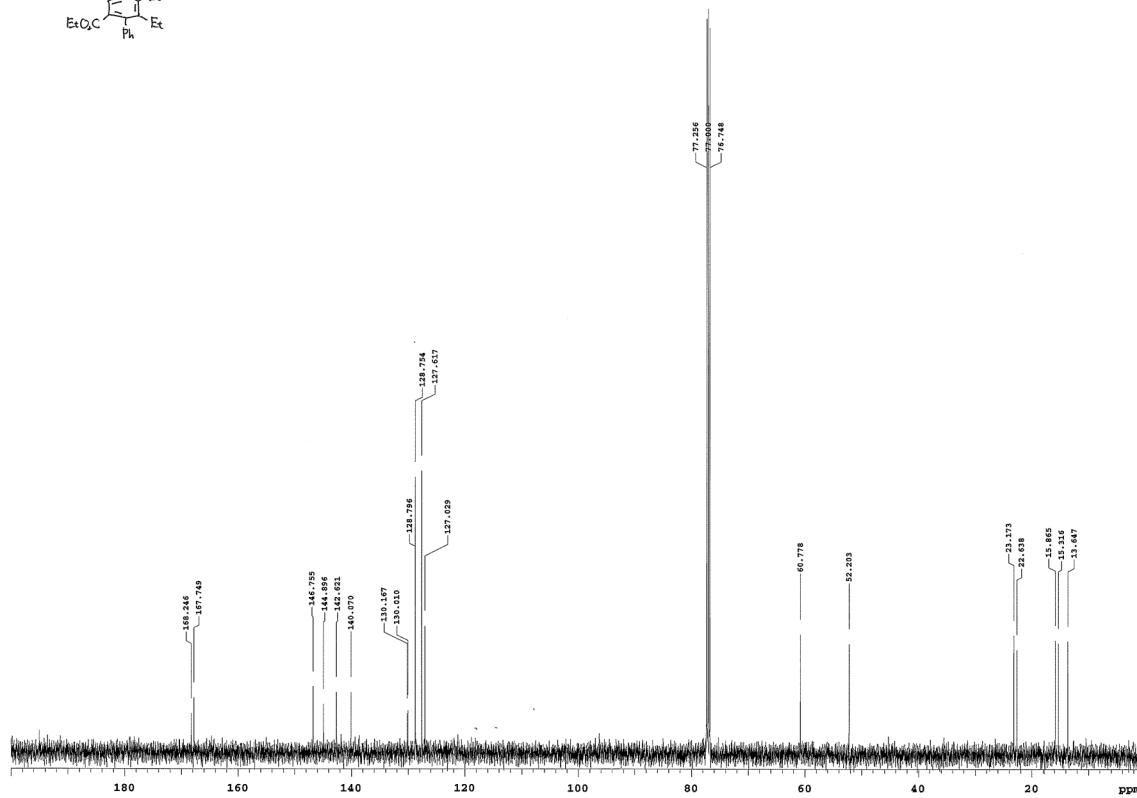



### 3ac

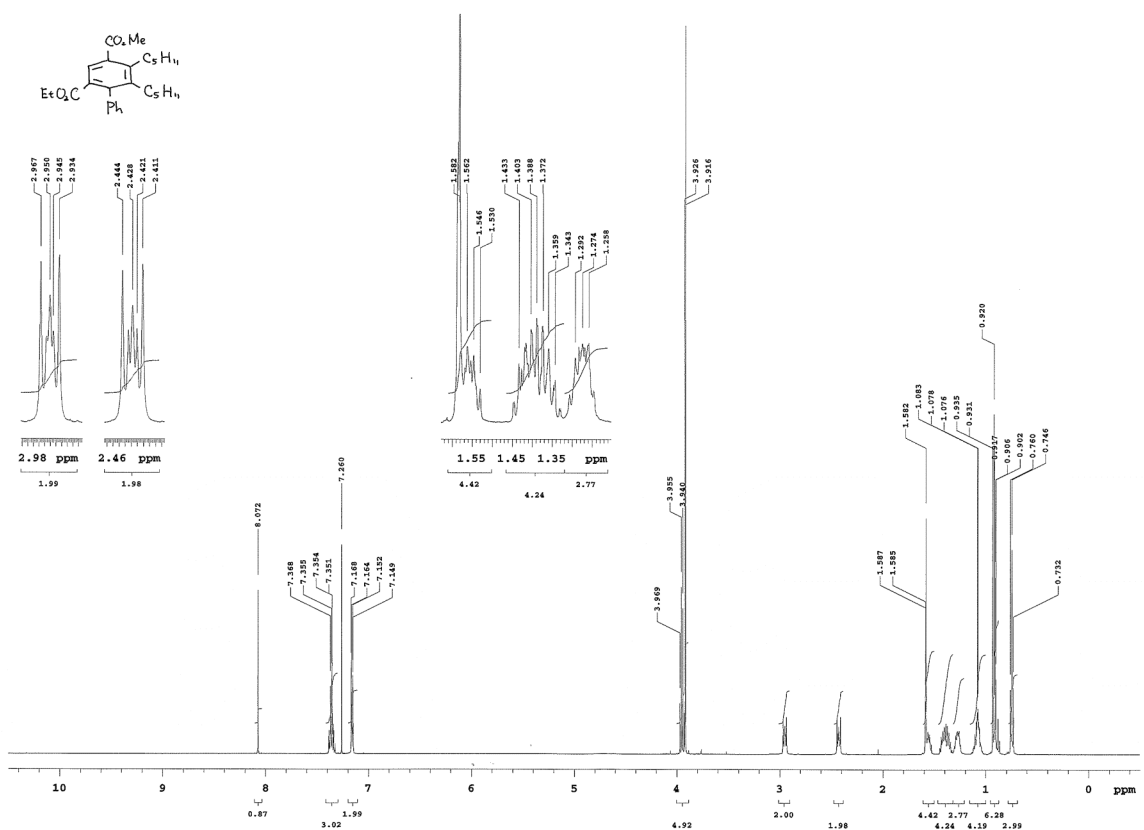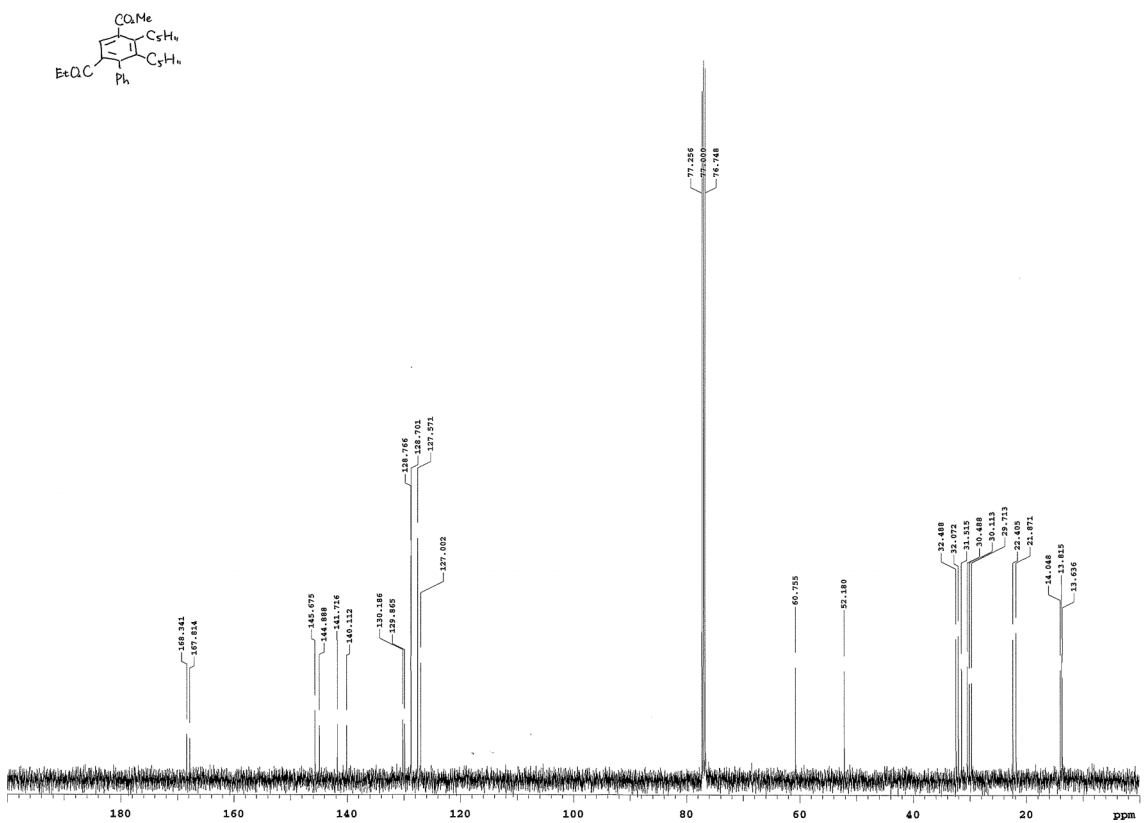

### 3ad

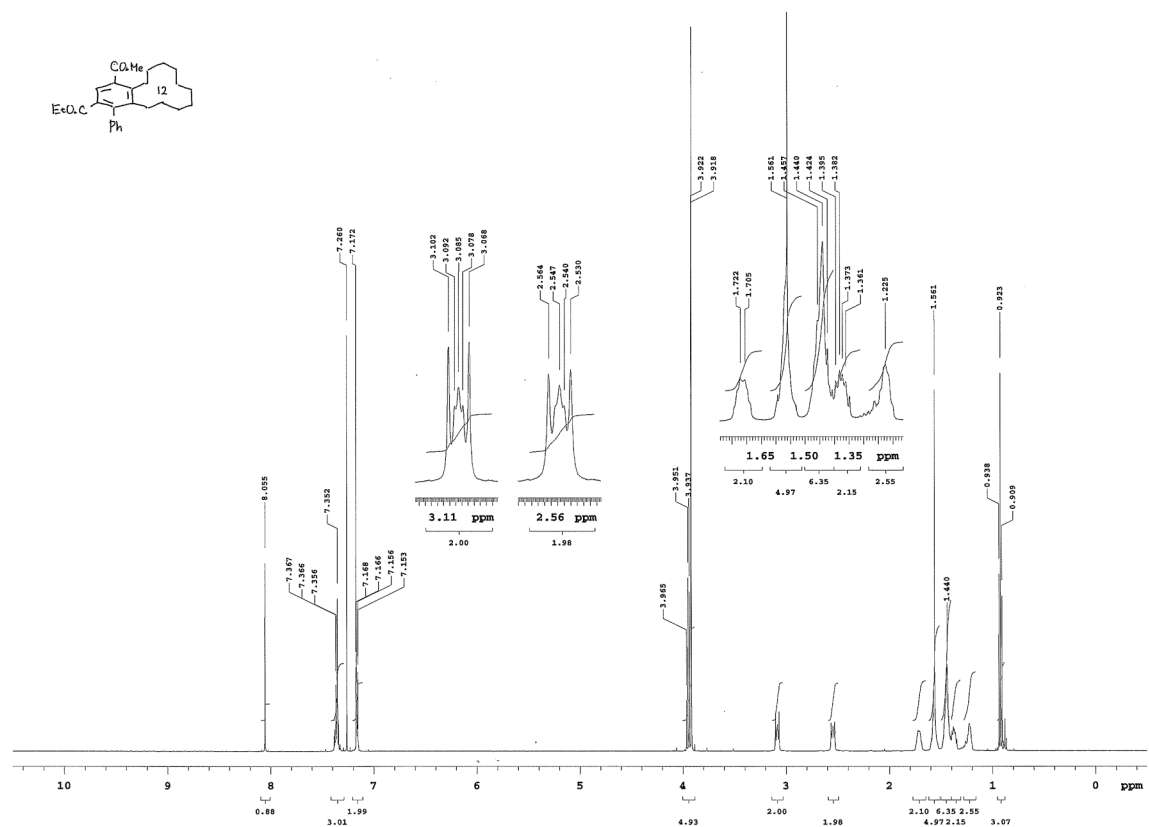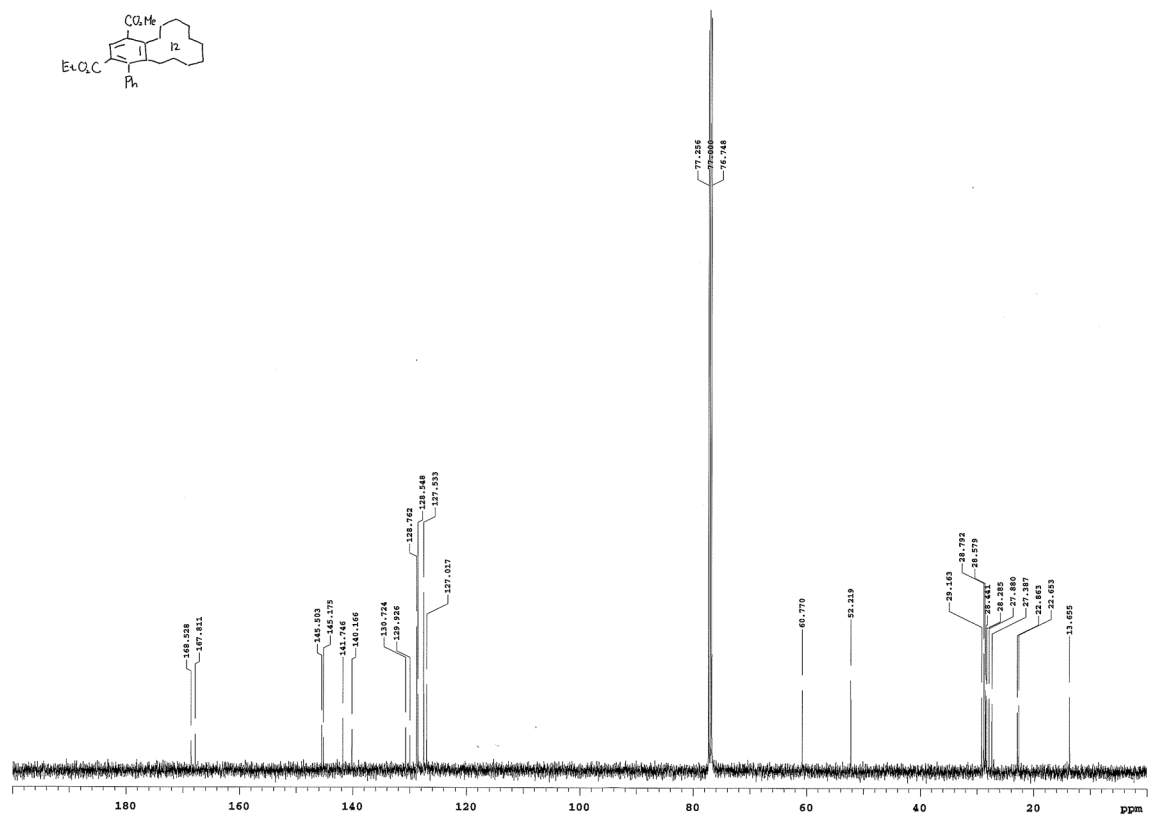

### 3ae

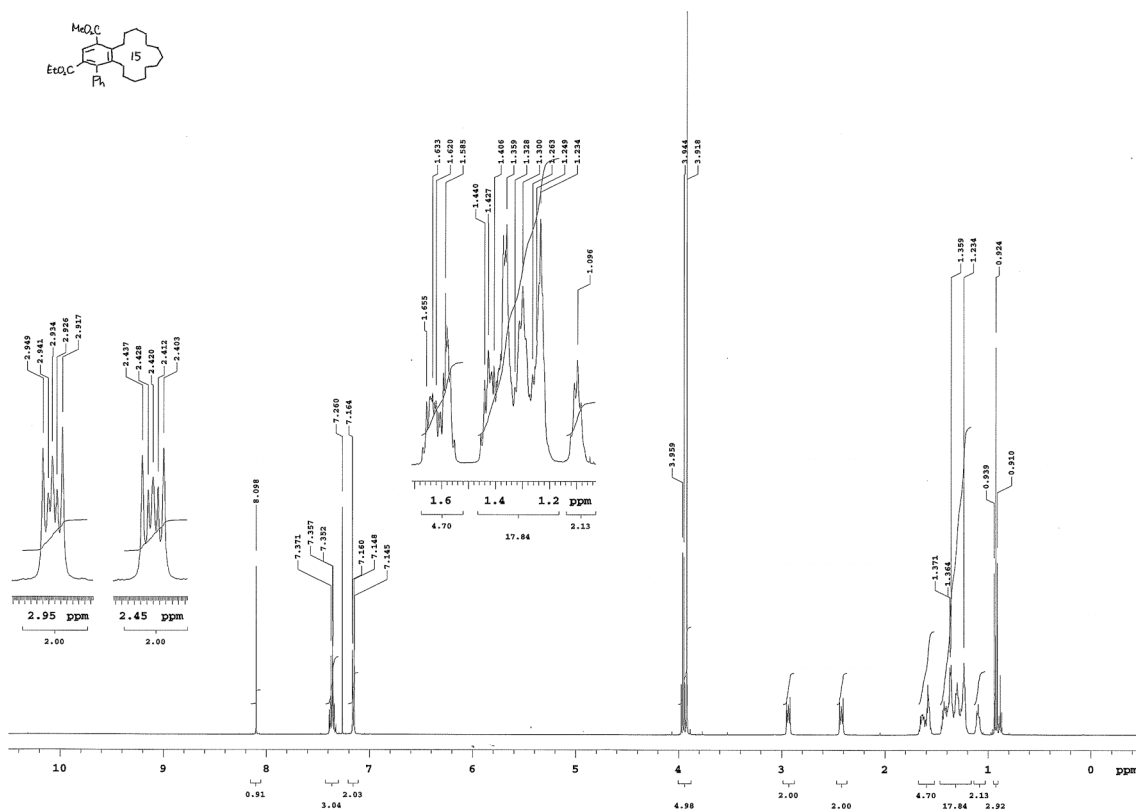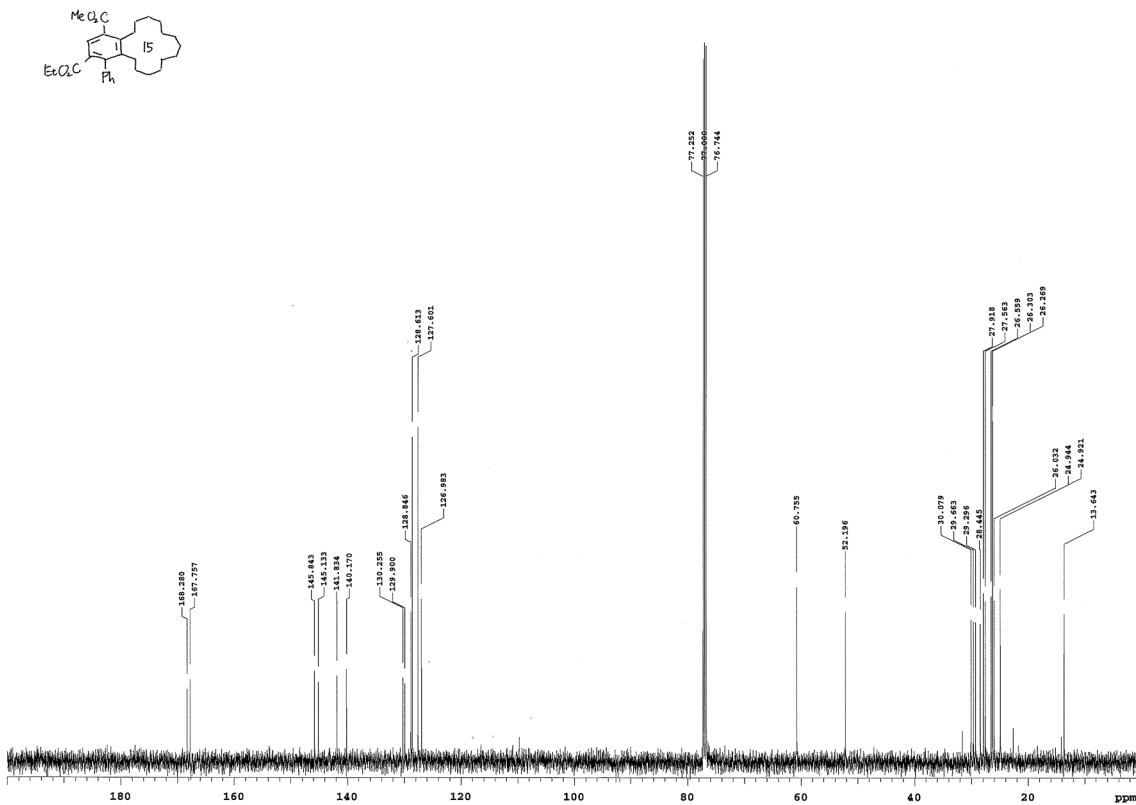

### 3af

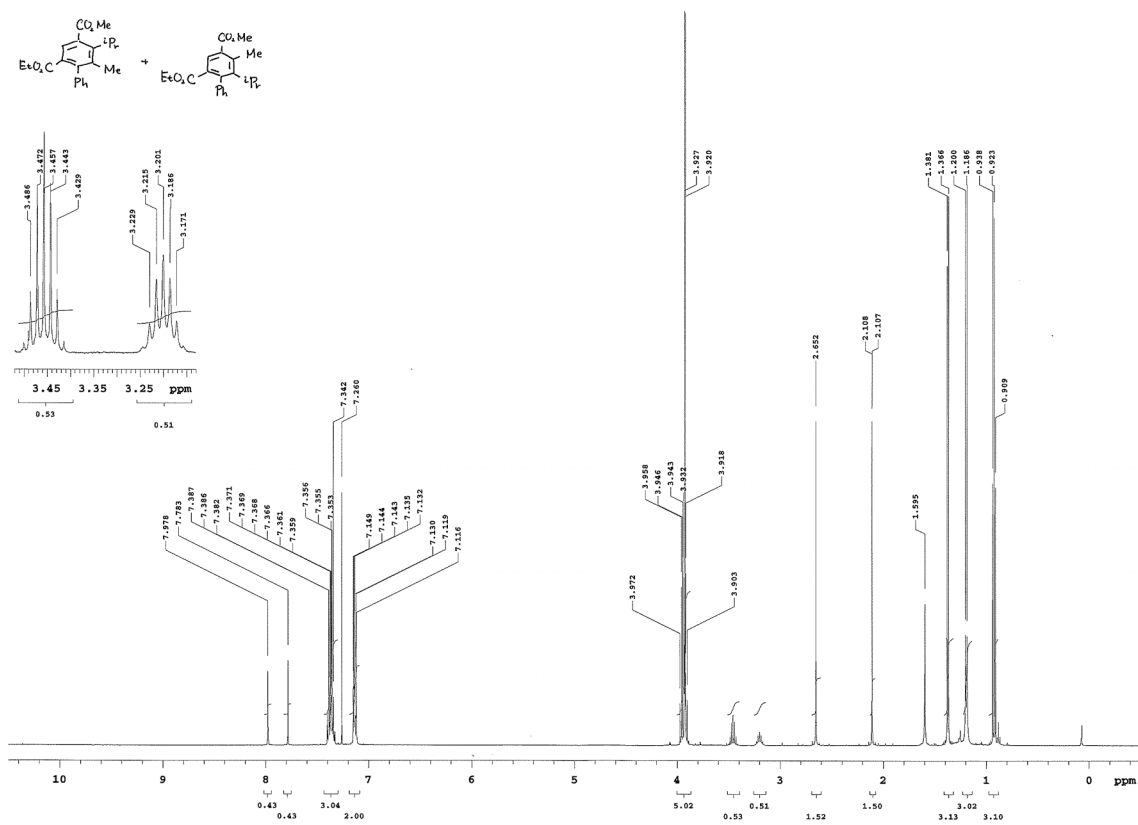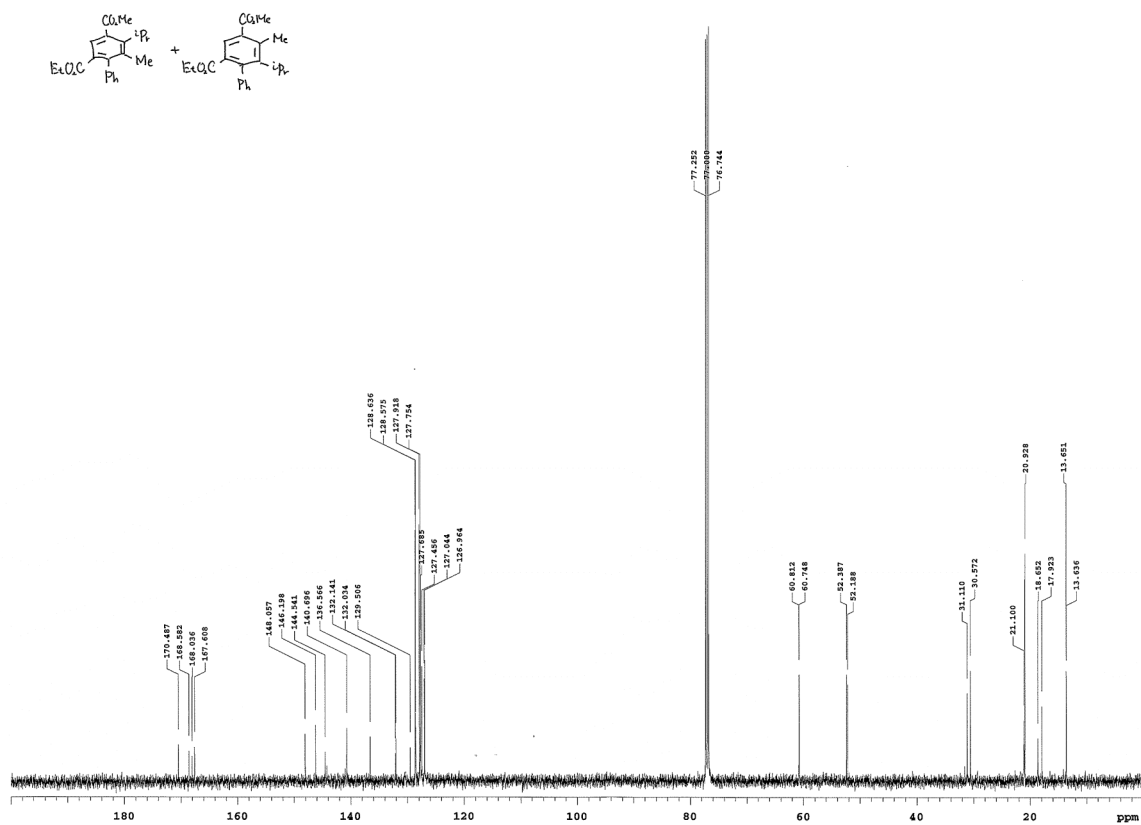

### 3hg

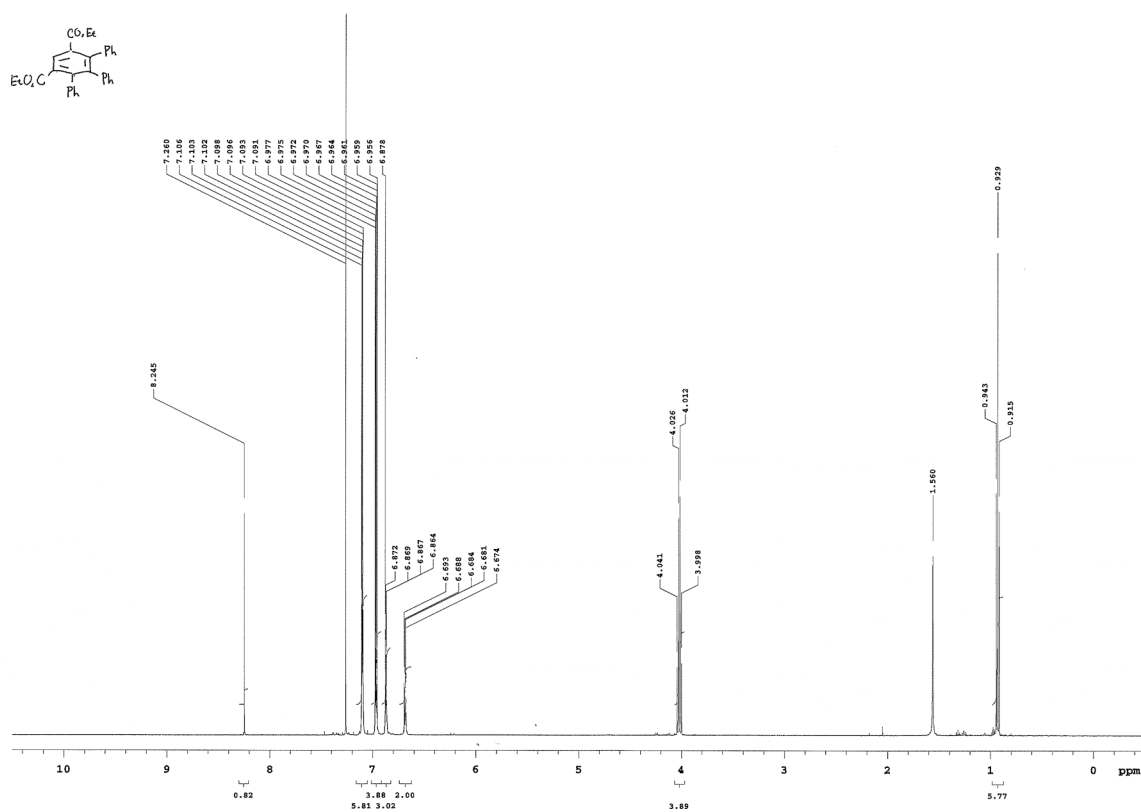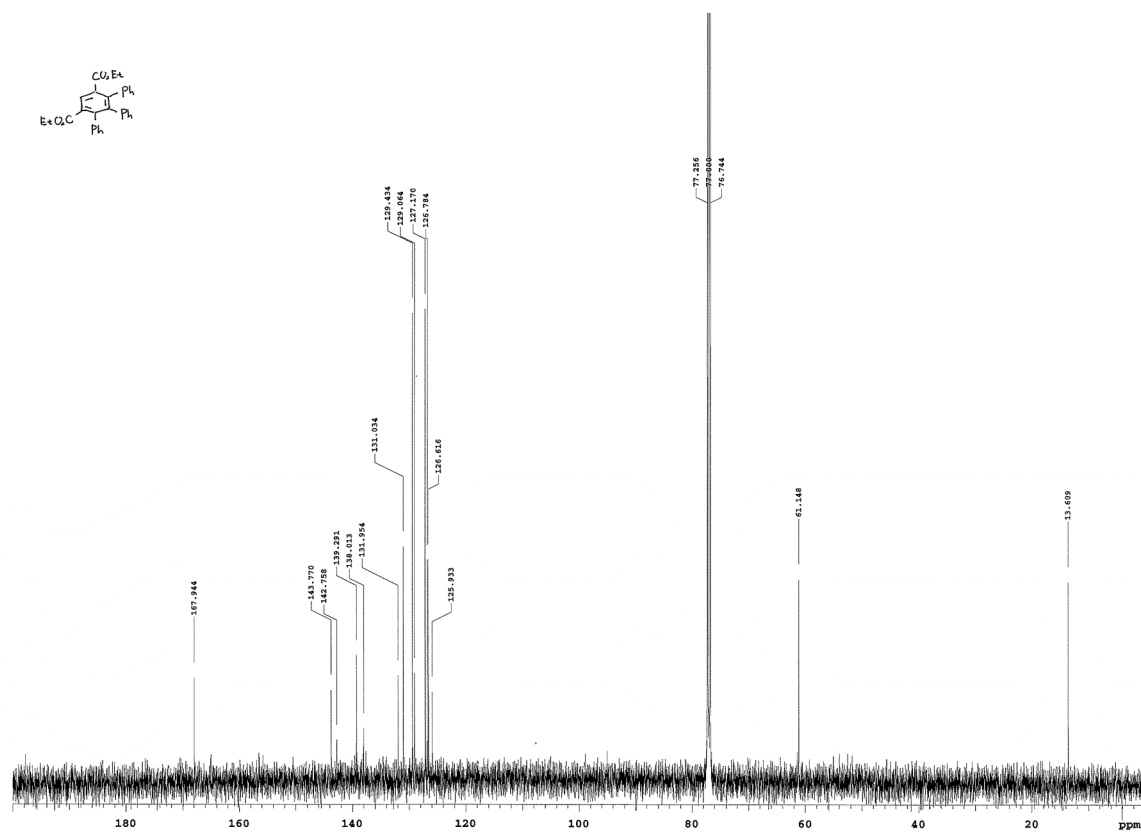

3hh

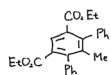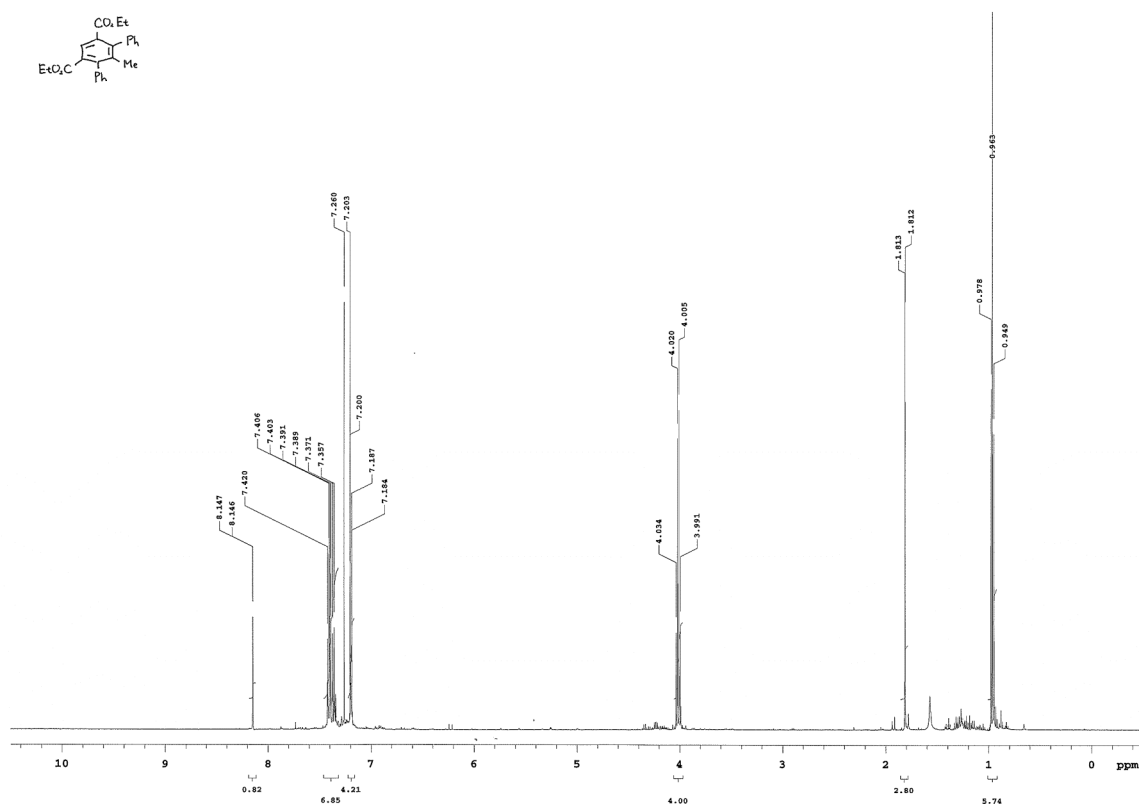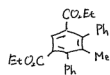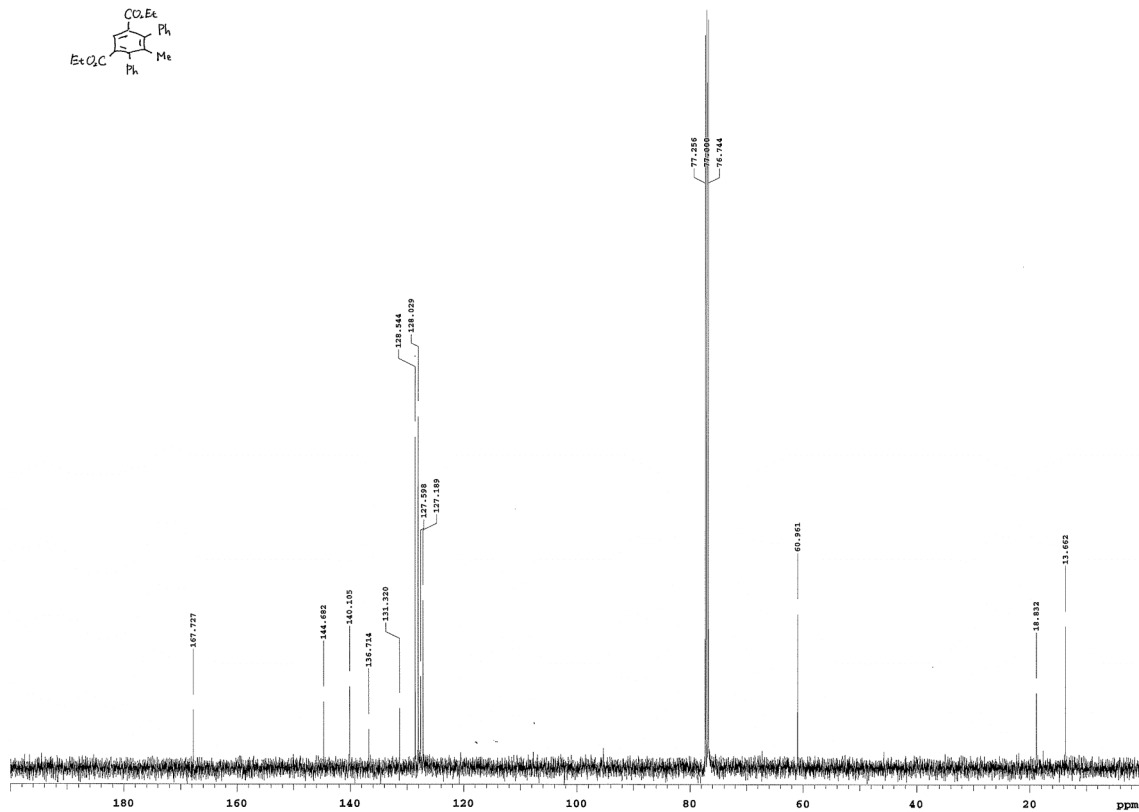

3ai

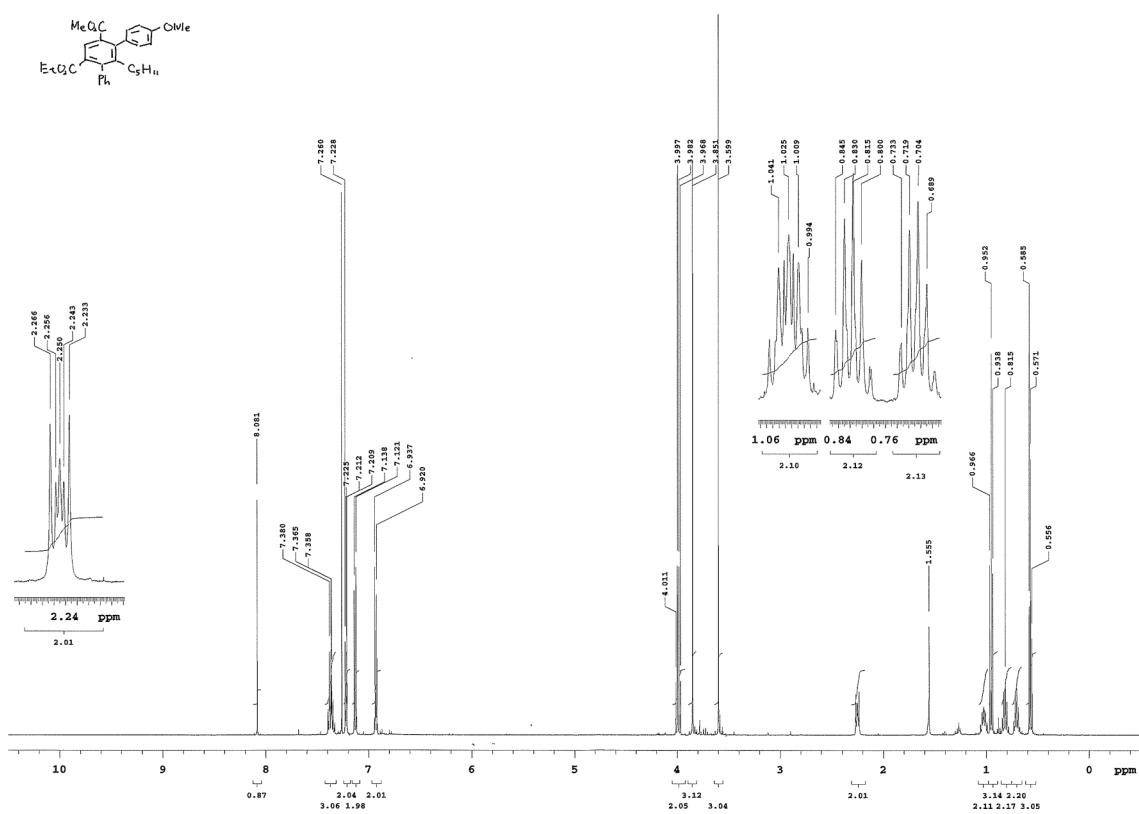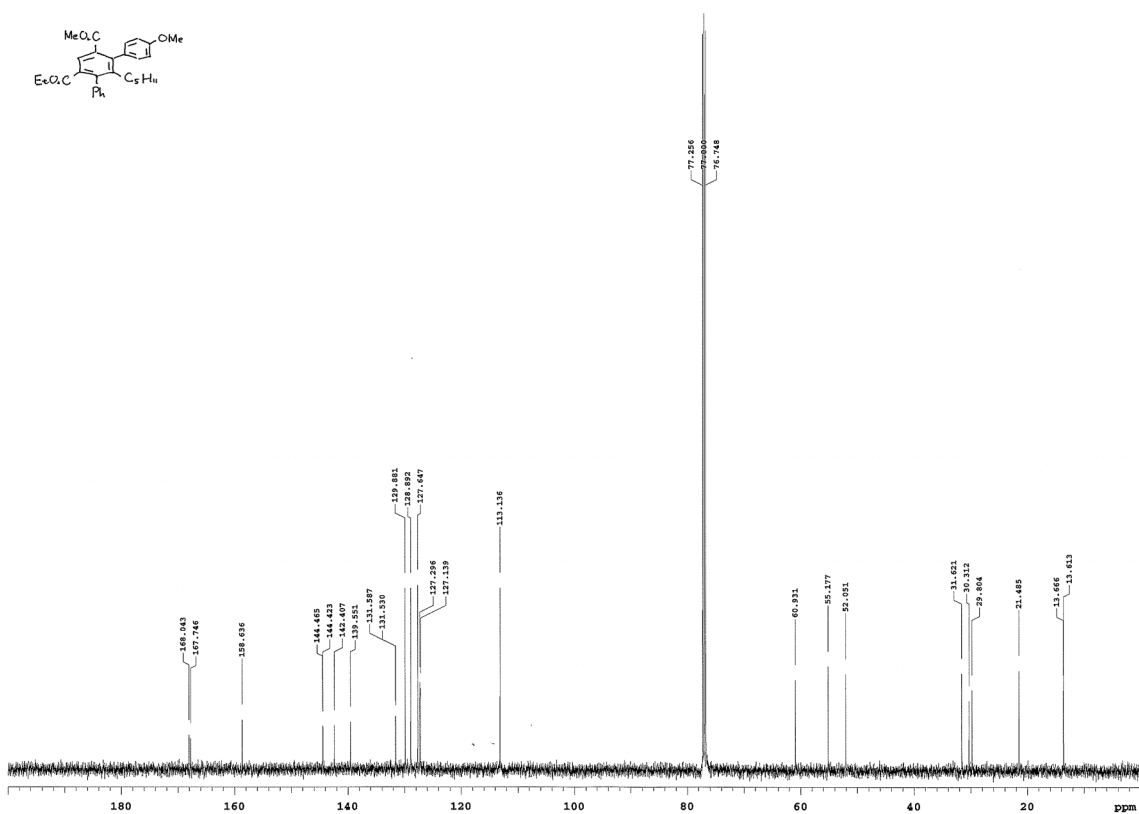

3aj

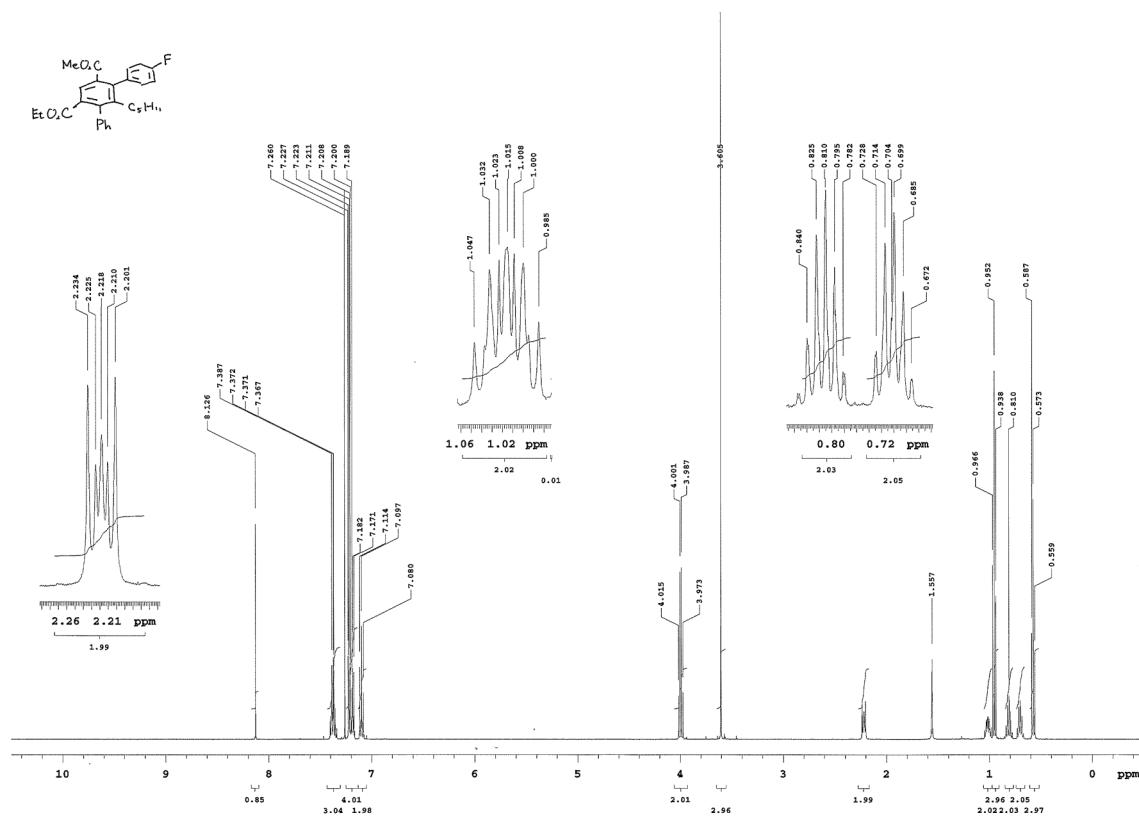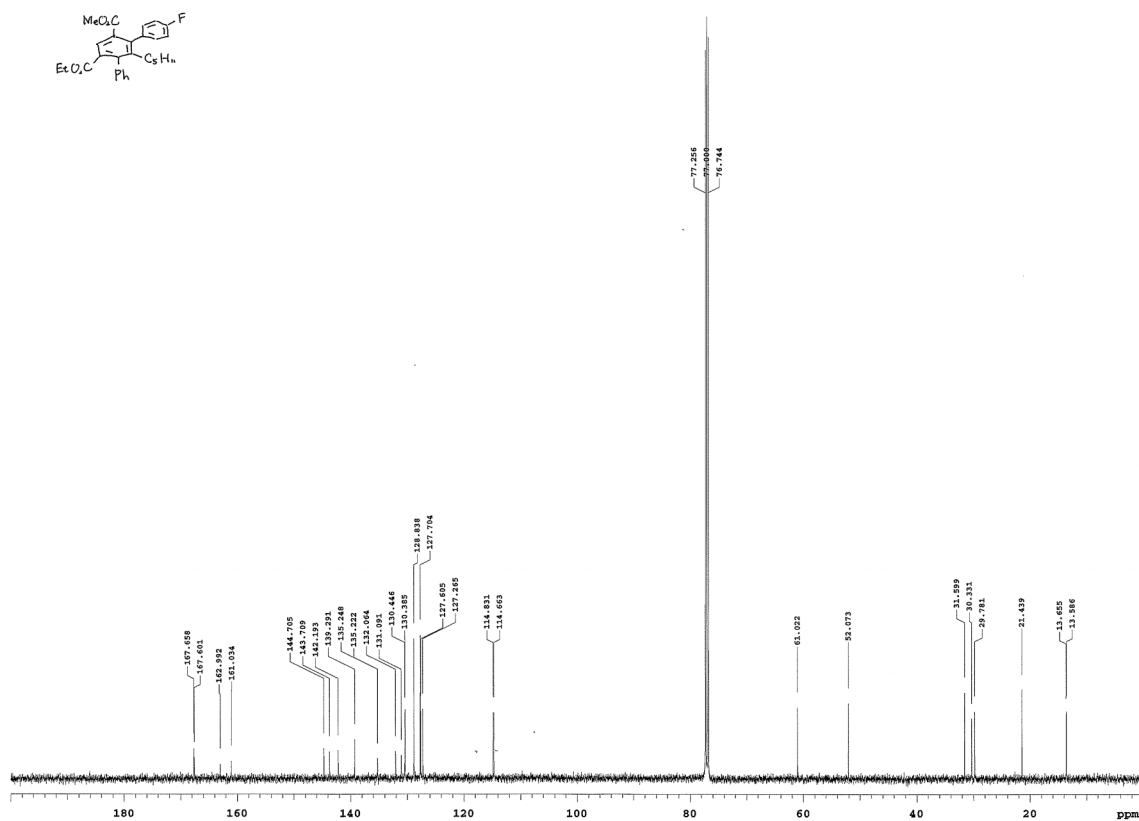

Supplement: c2cc30801k.pdf [file c2cc30801k.pdf]
